# Supplementary material for: Merging Genomics and Transcriptomics for Predicting Fusarium Head Blight Resistance in Wheat
Source: Genes (Basel). 2021 Jan 19;12(1):114. doi: 10.3390/genes12010114 (PMC7832326; doi:10.3390/genes12010114)
Supplement: Supplementary file 1 [file genes-12-00114-s001.zip › BLUPs_Fusatox.csv]

GENO	ORIGIN	AUDPC_ALL	ARET_REL	AD	PH	AUDPC_FC	AUDPC_FG	AUDPC_FS	ARET_REL_FC_IND	ARET_REL_FG_IND	ARET_REL_FS_IND
1304.4.8_P1	IFA_TULLN	68.7119998	9.386870226	23.45629478	93.79659222	31.79746526	130.7497157	10.61910405	16.98712488	9.819896142	6.999365063
1305.6.5_P1	IFA_TULLN	54.70568748	14.14044717	27.63249595	99.57774653	19.01632943	69.34245	5.798924052	25.0556059	14.08788773	11.08347268
1308.2.5_P1	IFA_TULLN	55.00867356	17.78576916	25.1992196	90.47932822	30.12166035	124.1746745	0	24.75581831	17.05824104	16.5869215
1309.2.4_P1	IFA_TULLN	55.26200196	26.56773828	30.0016535	104.6801566	23.22551855	80.80353102	4.816731012	31.25686045	27.57584168	23.43846082
1314.3.11_P1	IFA_TULLN	68.01137483	28.39406876	27.60661514	85.82605678	29.22590034	103.3637642	13.3867118	23.63806081	32.17293444	24.66794662
1351.5.10_P2	IFA_TULLN	52.01765261	18.17531864	28.86213662	93.49906619	19.6012699	96.06486522	0.803327919	17.92073811	19.12702334	17.09319438
1354.2.2_P2	IFA_TULLN	51.8886123	76.96580285	25.15578412	89.23182995	19.42959765	100.5889762	0.254820478	73.16670441	76.53794085	75.62656805
20568.1.3	IFA_TULLN	61.67980722	6.210949616	23.78486825	93.39055582	17.61520013	76.09375693	8.2687606	8.401505102	5.335526367	5.176578769
20812.2.2	IFA_TULLN	60.22058982	32.94339002	25.3817267	95.66371295	17.10347496	76.36490794	6.880480132	34.27780039	35.32572236	28.16222083
20818.1.2	IFA_TULLN	57.41795775	31.66802419	25.24142794	96.23711072	17.04225306	74.98863574	4.502167576	34.33004259	31.67286845	28.48051073
A39.9.2.1	IFA_TULLN	65.46352999	10.19074609	28.82705136	86.39761587	42.29958824	90.47591598	9.19174694	7.931218423	10.37755418	10.27357824
A40_22_1_2	IFA_TULLN	59.23235072	0	26.21787981	93.20678718	20.60692562	109.3570776	4.334115228	0	0	0
Accroc	VARIETY	149.3790932	80.60131493	20.9224407	70.45816249	300.1908519	269.4046851	57.25278793	76.0270499	81.65488027	78.49997397
Adagio	VARIETY	82.779391	23.23733234	20.93060881	72.14748398	90.08733393	153.2208934	18.68290604	37.81516227	25.38609286	13.64015085
Aligator	VARIETY	101.8303644	38.25107095	23.82300308	74.2450676	145.5142586	177.9090908	30.39231181	39.62155474	39.79464285	34.26340684
Alixan	VARIETY	113.4800556	54.41302619	24.26740231	74.70242473	349.1475328	173.6465922	40.51081982	49.7513298	59.18743643	49.1149558
Allez_y	VARIETY	182.0132556	78.35721555	26.54786927	83.54816647	658.2881659	312.0760817	70.81505089	68.1646002	82.59112092	73.23742161
Altigo	VARIETY	141.8068708	72.37369929	23.54367901	80.35067072	370.1880228	251.5682284	53.72715655	69.38300182	78.13767089	64.97976904
Ambello	VARIETY	80.6249774	78.6501156	22.24557817	75.22585181	92.10302808	144.4131747	17.66989053	78.07723356	79.78346044	74.62174446
Apache	VARIETY	89.20970561	7.637233364	23.10830407	73.19996388	97.95870689	149.2269125	23.13982756	7.856360702	8.701646973	5.569721068
Arezzo	VARIETY	96.28758531	91.9469525	23.37686235	71.68825888	206.3952326	167.9077468	22.84236436	81.55334734	91.8863775	90.70819041
Arkeos	VARIETY	162.0316153	84.11246743	22.95069746	73.57925827	430.3317336	279.8040904	67.32800246	67.29948791	82.17756832	88.30453015
Arlequin	VARIETY	110.91845	25.89841242	23.78408025	74.35602953	221.6827015	202.306177	33.49325204	35.40975408	23.79237901	21.96898173
Ascott	VARIETY	145.7518557	80.3981816	23.28264673	70.71705451	415.0243059	269.8510464	58.43244394	68.49863826	82.30799531	78.53030617
Azzerti	VARIETY	159.7991551	77.03702906	27.45751063	76.69119671	342.709896	266.8033516	72.97942653	65.98252364	81.39007481	73.75017647
Azzuro	VARIETY	95.20036639	32.40923703	26.18215117	82.19972696	140.7396512	160.0375621	24.11959462	40.7913789	29.4681945	29.83903667
Bagou	VARIETY	197.6095797	87.89107057	24.44203696	72.3128166	439.8952785	346.1419144	100.6996504	82.35826129	90.34092097	84.84544277
Barok	VARIETY	110.7109486	37.82406931	24.81044198	72.98998875	135.2468392	162.4190644	43.99255874	38.74014723	36.52571923	37.59796237
Basmati	VARIETY	93.4305461	59.08094442	22.25010271	72.31880324	247.2916921	185.6422616	18.67702883	60.58005103	60.18084034	55.11106328
Bergamo	VARIETY	120.3678947	45.11530327	27.73082163	78.95993139	151.9040672	183.8929387	53.75218482	44.443089	46.75842016	41.91106964
BIO_110	IFA_TULLN	87.9073907	35.23285469	23.96855086	77.30951193	75.21124192	191.1857981	14.53183003	43.50855133	35.82149573	29.64441992
BIO_4036	IFA_TULLN	76.91414932	17.75374842	21.22212582	80.7320981	39.79309147	144.60541	15.79338468	21.30064535	17.29485487	15.96365504
BIO_5019	IFA_TULLN	116.5856052	66.04308588	26.77093543	76.77824357	249.2870638	185.3599253	45.39595298	56.41927028	72.03071913	60.83976967
BIO_719	IFA_TULLN	76.8519015	42.9055631	21.8089878	74.46912453	51.23431989	138.0201777	15.52036543	54.58997682	42.05124988	37.27996544
Bonifacio	VARIETY	104.5827621	42.01853045	22.17012371	75.09712862	134.9086776	236.6742329	26.36847003	56.24602294	40.81771354	37.91096426
Boregar	VARIETY	133.7964275	57.04561623	23.99891752	70.99797453	358.2136556	303.0418091	37.55692364	57.78919821	59.19031831	52.09839836
Calabro	VARIETY	174.4743018	92.74130981	22.77677246	69.31005267	361.1524518	272.9877633	79.2442116	84.3358127	92.91276079	91.29208976
Capo	VARIETY	72.02913131	36.73902105	25.27582131	96.43902456	91.54411123	123.7647458	10.6458663	41.77324121	38.30680491	31.1077852
Cavalino	VARIETY	109.6390095	83.67469246	23.75970841	75.47570778	218.4252478	203.7990268	32.24761986	79.51785276	84.24778294	80.83881898
CH761525	VARIETY	118.0338311	28.12820042	26.4014733	92.00086312	271.7918598	195.0719564	41.28548677	26.8915442	27.39892454	28.16787526
Chevalier	VARIETY	119.1224688	59.93183169	28.14495132	82.15817141	189.3172984	176.9387099	53.6298301	54.23550498	62.93830063	56.7463632
Compil	VARIETY	137.5780763	65.51304451	24.83005687	71.06887282	425.0797264	213.9035169	52.76068648	66.35976938	71.24683322	56.0040968
Cordiale	VARIETY	162.5694085	73.17109952	25.75790696	68.90193392	409.2470071	233.0699095	89.44773036	66.43652335	75.26185266	71.111829
Fairplay	VARIETY	160.8311509	83.72759524	29.79139387	77.51568047	343.1922878	281.9153422	76.75747184	65.06397292	88.55760436	80.12993917
L_1	DESPREZ	91.58634459	18.99463084	21.57607631	71.80759953	164.881826	170.6604587	20.97336018	23.03448773	13.72713646	22.77382993
L_2	DESPREZ	114.4071382	54.1132977	24.59836071	78.87618351	192.1284589	194.8537093	39.23662476	50.79099691	55.09782007	52.56945527
L_3	DESPREZ	95.93526927	70.42615113	23.79328978	78.90580965	163.050043	192.6395532	22.69419962	61.21387668	71.35249758	69.45858625
L_4	DESPREZ	100.5695694	46.62093208	26.26504052	79.45727007	186.0623543	224.3083297	26.23491591	47.20967822	50.84793632	39.78922436
L_5	DESPREZ	102.358192	62.63281801	21.86468077	75.09406861	141.5059933	228.0482614	24.50887757	66.33162421	62.27332658	59.5653181
L_6	DESPREZ	113.7512903	55.86568183	21.30195505	67.74112059	350.320669	291.8683863	21.73455584	57.47942376	56.81027401	52.29627758
L_7	DESPREZ	105.8358677	38.67934589	26.84003877	77.05559087	307.1669376	168.2093542	31.63703075	39.92491664	42.07416255	33.0196415
L_8	DESPREZ	161.5322663	64.99306205	27.32378639	71.69332481	327.9366255	295.487675	73.14058771	54.04475842	69.54520981	60.40757517
L_9	DESPREZ	126.5947711	59.8995776	23.02175232	72.56727329	312.6330805	247.3511347	39.28313247	64.16461016	59.07708994	57.47693318
L_10	DESPREZ	123.2974355	84.50740446	22.86729915	72.06993461	261.6957036	231.5469072	43.43003272	73.16670441	84.9255435	84.10819359
Fluor	VARIETY	92.17533095	19.12131642	24.78786845	81.55830293	113.0632103	176.6245289	22.50597415	24.93162397	19.77287299	14.94880592
Goncourt	VARIETY	152.7857336	89.19334729	23.82027305	73.89817146	538.6504256	246.5222858	60.9929824	80.62321633	90.94803458	87.53398641
Graindor	VARIETY	83.23285291	6.135149383	22.19289766	77.22970363	55.49312848	152.9268517	19.58609164	10.03709175	5.61401292	4.859763854
Isengrain	VARIETY	137.5910052	74.1009436	23.85239638	74.11797097	390.7593691	244.704052	49.47178622	69.07701151	76.65864526	71.05935284
Joker	VARIETY	98.89986849	76.64369104	27.60864445	83.26398174	92.27540048	181.4800796	33.03640817	62.44727749	78.93950186	75.24385006
K11_16_AB.9	IFA_TULLN	80.21872178	24.70713635	26.73816441	91.53333902	50.00940925	139.7310505	18.25369711	26.92363449	28.95289429	18.26021195
K9_21_AB.18	IFA_TULLN	86.31398414	13.04558272	22.27570193	78.07118717	41.42084088	132.5696129	24.44165211	10.23076901	12.97602918	13.73084434
Kalystar	VARIETY	101.6518298	17.72594294	27.05860414	76.40549423	177.9414655	160.7711382	34.12040047	13.54168711	20.06549061	16.2312309
Karillon	VARIETY	197.4311795	67.20395953	25.53693855	75.87861565	319.3744899	263.2156837	107.5846524	52.47731955	73.73018231	61.14149383
Laurier	VARIETY	149.1200529	93.13490176	24.26476486	75.13437769	502.5216902	245.11924	52.27762422	83.40219947	93.72716696	91.54682014
Lyrik	VARIETY	146.1664	71.26761859	24.91583888	77.03961049	161.5577219	219.5627479	78.06041249	56.66145385	78.2617413	64.38378383
Manager	VARIETY	117.7002031	62.12409351	28.84794016	83.27584316	132.1280235	191.2947121	48.80523201	54.27906918	64.65934628	60.13179527
Mendel	VARIETY	169.8188521	89.3305769	25.513433	70.54690864	393.3739612	272.453851	86.20927671	83.81326328	92.89235482	84.93716197
Mercato	VARIETY	103.3465591	75.85836686	22.16667274	69.01365629	226.3715455	167.544695	30.82077255	68.70414106	79.22403757	72.98014803
Midas	VARIETY	83.58018859	34.50807996	25.42204302	87.6674189	58.5183246	139.1679702	19.00280421	40.41462293	35.78302883	28.39152373
Miroir	VARIETY	77.52406011	23.8552205	20.8606987	72.31718023	76.14689208	154.6841687	13.49156966	27.27269087	24.10037494	21.51839641
Musik	VARIETY	167.3258442	82.45229298	23.25821716	65.71293967	492.5689275	285.7071382	66.52113222	77.20781138	81.65957	82.8164832
Noblesko	VARIETY	128.5684075	83.8966313	28.32764207	78.2971675	310.4503059	271.3590834	41.00009876	67.56502503	86.55435583	82.28205692
Nogal	VARIETY	89.91664387	55.23768696	20.20033233	71.56877169	96.08205999	197.6284555	15.69885647	57.76223206	51.45113744	56.37587228
Nuage	VARIETY	147.7090685	50.75875172	26.4042041	75.20685146	402.9546916	239.7311632	65.76017262	48.71206992	54.56014842	45.25151126
Oxebo	VARIETY	93.14089812	41.14688556	27.31753617	80.55337964	117.035368	158.1821541	29.80355838	31.1599696	44.20483419	40.3773564
Pakito	VARIETY	98.23210585	63.09014604	22.64028176	73.74811747	213.9527218	185.1307868	24.21974397	55.59683944	64.63311376	62.59152046
Phare	VARIETY	204.4089813	85.18365018	27.17438998	74.41441671	480.1751999	334.4174211	99.81769429	74.44858664	88.69118643	82.53616641
Premio	VARIETY	113.495008	72.8236156	23.58418453	72.18757716	439.4645066	218.7358445	25.54297649	66.93158918	76.27870543	69.50027208
Renan	VARIETY	81.12410409	33.31894202	24.99191477	82.90320392	75.3363408	115.9390147	21.95972701	36.14000644	33.58158629	29.8935707
RHT_216	IFA_TULLN	63.54861919	47.72216574	24.92554744	83.10857593	18.71476638	110.3708046	8.378823365	45.27644836	53.80899939	39.99480922
RHT_269	IFA_TULLN	72.81564598	42.13671275	24.46205323	84.22234896	31.97086515	132.2123447	13.20158754	48.41534713	43.65410789	36.17901073
Ronsard	VARIETY	111.8226258	53.15897464	22.75911935	68.08836527	253.2586669	252.6594249	26.44243529	44.95264342	56.95246323	49.80109721
Royssac	VARIETY	231.4242232	83.84311047	22.78104664	69.97389934	732.8323874	369.2610331	126.3073857	77.50043079	85.07217889	82.65338167
Rubisko	VARIETY	88.29019616	72.49306287	23.21952883	68.63391109	185.7662833	181.6007225	17.13285114	58.74707504	72.31960236	74.19465605
L_11	RAGT	173.6100224	74.31193834	23.23049599	66.11504316	686.5694424	297.7195697	60.0273509	70.51575851	75.35484889	71.35278575
L_12	RAGT	145.2494119	64.80980264	23.96125279	71.69332481	501.4187323	264.4221133	46.77583611	46.46020925	68.33680925	63.76209412
L_13	RAGT	123.2344546	78.07402843	27.88416175	79.59290224	266.2018729	262.3108615	38.31534432	72.19884071	81.71532673	72.30045655
L_14	RAGT	108.7104924	49.98429689	21.52369521	69.74581357	185.8562839	228.0482614	29.48691007	52.06188864	49.5661787	48.22155287
L_15	RAGT	101.2591076	63.29795508	21.10641675	72.85145802	365.2342143	203.7387054	17.06756145	59.83058207	62.22591869	63.34734134
Sokal	VARIETY	92.09061316	6.28087633	24.29244965	73.8505075	117.6555886	174.0713944	21.58928873	11.30221909	7.310001521	3.007665176
Sy_Moisson	VARIETY	88.06456541	53.99404809	23.47687967	76.89608731	99.71338284	220.689041	15.31244388	75.18382466	50.89534421	49.4368863
Timber	VARIETY	282.4721062	84.00427279	28.15888888	73.48972723	408.2256118	452.4042042	177.9235165	77.61943269	87.90080547	79.8633276
Tobak	VARIETY	145.8831331	84.77180655	28.98321231	81.76698397	221.9444835	240.7268985	70.45019449	73.72256278	88.27577572	82.35232681
Toisondor	VARIETY	275.4740798	83.76604339	25.75909568	66.771621	846.5501628	407.1142394	168.990749	76.91321583	84.76747638	82.87754422
Tulip	VARIETY	112.0424836	63.62377005	22.27652935	79.7839869	182.1099825	180.6188036	41.02682204	57.86434742	65.65801275	61.69120596
UNG_136.16.7.4.7	IFA_TULLN	56.84969164	2.650930046	24.6250356	96.6623558	17.18703788	98.21970192	3.911425273	1.889338623	2.658442573	2.934945834
