# Supplementary material for: Merging Genomics and Transcriptomics for Predicting Fusarium Head Blight Resistance in Wheat
Source: Genes (Basel). 2021 Jan 19;12(1):114. doi: 10.3390/genes12010114 (PMC7832326; doi:10.3390/genes12010114)
Supplement: Supplementary file 1 [file genes-12-00114-s001.zip › data_pheno_GP_RNAseq.csv]

YEAR	TRIAL	ISOLATE	REP	GENO	ORIGIN	AD	AUDPC5	PH	ARET_REL
2011	TU_FG_2011	FG	1	Midas	VARIETY	25	85	90	12.5
2011	TU_FG_2011	FG	1	20568.1.3	IFA_TULLN	23	1	95	12.5
2011	TU_FG_2011	FG	1	Nuage	VARIETY	25	256	70	37.5
2011	TU_FG_2011	FG	1	Aligator	VARIETY	23	133	75	37.5
2011	TU_FG_2011	FG	1	Isengrain	VARIETY	25	261	80	50
2011	TU_FG_2011	FG	1	Altigo	VARIETY	25	477	80	62.5
2011	TU_FG_2011	FG	1	Premio	VARIETY	23	205	75	50
2011	TU_FG_2011	FG	1	Apache	VARIETY	23	109	75	12.5
2011	TU_FG_2011	FG	1	Arlequin	VARIETY	23	169	75	25
2011	TU_FG_2011	FG	1	Timber	VARIETY	27	400	70	25
2011	TU_FG_2011	FG	1	Alixan	VARIETY	23	82	75	37.5
2011	TU_FG_2011	FG	1	Chevalier	VARIETY	27	142	85	50
2011	TU_FG_2011	FG	1	Cordiale	VARIETY	25	312	65	62.5
2011	TU_FG_2011	FG	1	Azzuro	VARIETY	25	149	80	50
2011	TU_FG_2011	FG	1	Toisondor	VARIETY	25	489	65	87.5
2011	TU_FG_2011	FG	1	20818.1.2	IFA_TULLN	23	2	95	25
2011	TU_FG_2011	FG	1	Mendel	VARIETY	23	140	70	100
2011	TU_FG_2011	FG	1	Barok	VARIETY	23	94	75	62.5
2011	TU_FG_2011	FG	1	Mercato	VARIETY	23	126	70	50
2011	TU_FG_2011	FG	1	Bagou	VARIETY	25	541	75	100
2011	TU_FG_2011	FG	1	Boregar	VARIETY	23	421	70	50
2011	TU_FG_2011	FG	1	Capo	VARIETY	25	72	105	12.5
2011	TU_FG_2011	FG	1	A39.9.2.1	IFA_TULLN	27	48.4	90	12.5
2011	TU_FG_2011	FG	1	Royssac	VARIETY	25	720	70	87.5
2011	TU_FG_2011	FG	1	Renan	VARIETY	25	78	85	37.5
2011	TU_FG_2011	FG	1	20812.2.2	IFA_TULLN	25	1	95	25
2011	TU_FG_2011	FG	2	Isengrain	VARIETY	25	441	70	37.5
2011	TU_FG_2011	FG	2	Mercato	VARIETY	23	132	65	37.5
2011	TU_FG_2011	FG	2	Capo	VARIETY	27	125.8	100	50
2011	TU_FG_2011	FG	2	Aligator	VARIETY	23	133	75	37.5
2011	TU_FG_2011	FG	2	Premio	VARIETY	25	308	75	37.5
2011	TU_FG_2011	FG	2	Alixan	VARIETY	25	220	75	37.5
2011	TU_FG_2011	FG	2	Mendel	VARIETY	25	256	70	87.5
2011	TU_FG_2011	FG	2	Toisondor	VARIETY	25	510	60	75
2011	TU_FG_2011	FG	2	Nuage	VARIETY	25	240	70	50
2011	TU_FG_2011	FG	2	Midas	VARIETY	25	72	85	25
2011	TU_FG_2011	FG	2	Barok	VARIETY	25	172	70	25
2011	TU_FG_2011	FG	2	Boregar	VARIETY	25	653	70	25
2011	TU_FG_2011	FG	2	Azzuro	VARIETY	25	64	80	25
2011	TU_FG_2011	FG	2	20568.1.3	IFA_TULLN	25	2.4	90	25
2011	TU_FG_2011	FG	2	Renan	VARIETY	25	72	80	12.5
2011	TU_FG_2011	FG	2	Altigo	VARIETY	23	148	80	62.5
2011	TU_FG_2011	FG	2	Apache	VARIETY	23	164	70	25
2011	TU_FG_2011	FG	2	Arlequin	VARIETY	23	200	75	25
2011	TU_FG_2011	FG	2	Cordiale	VARIETY	27	432	65	87.5
2011	TU_FG_2011	FG	2	A39.9.2.1	IFA_TULLN	29	75	85	12.5
2011	TU_FG_2011	FG	2	Bagou	VARIETY	25	601	70	100
2011	TU_FG_2011	FG	2	Timber	VARIETY	27	617	70	100
2011	TU_FG_2011	FG	2	Chevalier	VARIETY	27	123.4	80	100
2011	TU_FG_2011	FG	2	Royssac	VARIETY	23	577	70	87.5
2011	TU_FG_2011	FG	2	20818.1.2	IFA_TULLN	25	1.4	95	25
2011	TU_FG_2011	FG	2	20812.2.2	IFA_TULLN	25	1.4	95	12.5
2011	TU_FG_2011	FG	3	20812.2.2	IFA_TULLN	25	1.4	95	25
2011	TU_FG_2011	FG	3	Renan	VARIETY	27	49.4	90	62.5
2011	TU_FG_2011	FG	3	Barok	VARIETY	25	145	75	25
2011	TU_FG_2011	FG	3	Altigo	VARIETY	23	348	80	25
2011	TU_FG_2011	FG	3	A39.9.2.1	IFA_TULLN	29	36	85	25
2011	TU_FG_2011	FG	3	Aligator	VARIETY	23	116	80	25
2011	TU_FG_2011	FG	3	Isengrain	VARIETY	23	104.4	70	37.5
2011	TU_FG_2011	FG	3	20818.1.2	IFA_TULLN	25	1.2	95	37.5
2011	TU_FG_2011	FG	3	Alixan	VARIETY	25	149	80	37.5
2011	TU_FG_2011	FG	3	Capo	VARIETY	25	52	105	25
2011	TU_FG_2011	FG	3	Premio	VARIETY	23	84	70	25
2011	TU_FG_2011	FG	3	Arlequin	VARIETY	23	201.8	70	50
2011	TU_FG_2011	FG	3	Bagou	VARIETY	25	341	75	87.5
2011	TU_FG_2011	FG	3	Cordiale	VARIETY	25	264	65	75
2011	TU_FG_2011	FG	3	Timber	VARIETY	27	373	75	100
2011	TU_FG_2011	FG	3	Chevalier	VARIETY	27	236	80	87.5
2011	TU_FG_2011	FG	3	Azzuro	VARIETY	25	98.8	80	50
2011	TU_FG_2011	FG	3	Toisondor	VARIETY	25	410	65	87.5
2011	TU_FG_2011	FG	3	Midas	VARIETY	27	83.4	95	25
2011	TU_FG_2011	FG	3	Mendel	VARIETY	27	306	70	87.5
2011	TU_FG_2011	FG	3	20568.1.3	IFA_TULLN	23	2.6	100	25
2011	TU_FG_2011	FG	3	Royssac	VARIETY	23	560	75	75
2011	TU_FG_2011	FG	3	Mercato	VARIETY	23	92.8	70	50
2011	TU_FG_2011	FG	3	Boregar	VARIETY	23	240.8	75	50
2011	TU_FG_2011	FG	3	Apache	VARIETY	23	66.4	75	12.5
2011	TU_FG_2011	FG	3	Nuage	VARIETY	27	341	75	37.5
2012	TU_FG_2012	FG	1	Kalystar	VARIETY	31	38.2	70	30
2012	TU_FG_2012	FG	1	Fluor	VARIETY	27	9.6	75	55
2012	TU_FG_2012	FG	1	Compil	VARIETY	27	28	60	85
2012	TU_FG_2012	FG	1	Midas	VARIETY	25	46	70	65
2012	TU_FG_2012	FG	1	Tobak	VARIETY	31	51	70	100
2012	TU_FG_2012	FG	1	Alixan	VARIETY	27	20	65	70
2012	TU_FG_2012	FG	1	UNG_136.16.7.4.7	IFA_TULLN	27	0.6	85	25
2012	TU_FG_2012	FG	1	K11_16_AB.9	IFA_TULLN	31	20.8	80	20
2012	TU_FG_2012	FG	1	RHT_216	IFA_TULLN	29	0.6	70	30
2012	TU_FG_2012	FG	1	Oxebo	VARIETY	31	37.6	75	40
2012	TU_FG_2012	FG	1	20818.1.2	IFA_TULLN	27	0	90	45
2012	TU_FG_2012	FG	1	BIO_5019	IFA_TULLN	29	57.4	70	60
2012	TU_FG_2012	FG	1	Timber	VARIETY	35	344	60	95
2012	TU_FG_2012	FG	1	RHT_269	IFA_TULLN	27	4	70	60
2012	TU_FG_2012	FG	1	BIO_719	IFA_TULLN	23	11.4	65	55
2012	TU_FG_2012	FG	1	Bagou	VARIETY	27	113	65	100
2012	TU_FG_2012	FG	1	Musik	VARIETY	27	241	60	100
2012	TU_FG_2012	FG	1	L_2	DESPREZ	27	58.8	75	65
2012	TU_FG_2012	FG	1	Nuage	VARIETY	31	131	70	65
2012	TU_FG_2012	FG	1	Mendel	VARIETY	31	113	65	90
2012	TU_FG_2012	FG	1	Graindor	VARIETY	23	4	65	25
2012	TU_FG_2012	FG	1	Azzuro	VARIETY	27	9.6	80	65
2012	TU_FG_2012	FG	1	Sokal	VARIETY	25	32.8	65	15
2012	TU_FG_2012	FG	1	Renan	VARIETY	27	3	65	55
2012	TU_FG_2012	FG	1	Premio	VARIETY	25	90	60	80
2012	TU_FG_2012	FG	1	Boregar	VARIETY	27	71	60	100
2012	TU_FG_2012	FG	1	L_1	DESPREZ	23	62.4	60	55
2012	TU_FG_2012	FG	1	BIO_110	IFA_TULLN	27	16.4	60	60
2012	TU_FG_2012	FG	1	Isengrain	VARIETY	25	42.4	65	85
2012	TU_FG_2012	FG	1	Cordiale	VARIETY	25	62.4	60	100
2012	TU_FG_2012	FG	1	Adagio	VARIETY	23	9.4	60	50
2012	TU_FG_2012	FG	1	Chevalier	VARIETY	31	7.6	70	60
2012	TU_FG_2012	FG	1	Royssac	VARIETY	23	283	60	95
2012	TU_FG_2012	FG	1	Azzerti	VARIETY	31	115	70	85
2012	TU_FG_2012	FG	1	BIO_4036	IFA_TULLN	23	9.6	70	20
2012	TU_FG_2012	FG	1	Nogal	VARIETY	21	29.8	60	60
2012	TU_FG_2012	FG	1	Aligator	VARIETY	25	52	65	70
2012	TU_FG_2012	FG	1	Barok	VARIETY	27	38	70	80
2012	TU_FG_2012	FG	1	Tulip	VARIETY	23	72.4	75	95
2012	TU_FG_2012	FG	1	20812.2.2	IFA_TULLN	27	0	80	40
2012	TU_FG_2012	FG	1	Goncourt	VARIETY	27	53	60	100
2012	TU_FG_2012	FG	1	Altigo	VARIETY	25	94.4	70	90
2012	TU_FG_2012	FG	1	K9_21_AB.18	IFA_TULLN	25	42.4	70	25
2012	TU_FG_2012	FG	1	Arlequin	VARIETY	27	24	65	55
2012	TU_FG_2012	FG	1	Manager	VARIETY	33	97	75	90
2012	TU_FG_2012	FG	1	Mercato	VARIETY	25	92.4	60	85
2012	TU_FG_2012	FG	1	Pakito	VARIETY	25	64.6	65	80
2012	TU_FG_2012	FG	1	Ambello	VARIETY	25	18.4	65	90
2012	TU_FG_2012	FG	1	A39.9.2.1	IFA_TULLN	31	1.8	80	25
2012	TU_FG_2012	FG	1	20568.1.3	IFA_TULLN	25	0	80	10
2012	TU_FG_2012	FG	1	Phare	VARIETY	31	372	70	100
2012	TU_FG_2012	FG	1	Toisondor	VARIETY	27	210	60	100
2012	TU_FG_2012	FG	1	Capo	VARIETY	25	1.4	70	90
2012	TU_FG_2012	FG	1	Apache	VARIETY	25	18.4	65	25
2012	TU_FG_2012	FG	1	A40_22_1_2	IFA_TULLN	29	4	80	0
2012	TU_FG_2012	FG	1	Accroc	VARIETY	23	281.4	60	100
2012	TU_FG_2012	FG	1	Miroir	VARIETY	23	8.8	65	15
2012	TU_FG_2012	FG	1	CH761525	VARIETY	27	86	80	50
2013	TU_FG_2013	FG	1	Sy_Moisson	VARIETY	34	317	70	80
2013	TU_FG_2013	FG	1	Calabro	VARIETY	28	160.4	65	100
2013	TU_FG_2013	FG	1	L_11	RAGT	28	232.4	65	85
2013	TU_FG_2013	FG	1	1314.3.11_P1	IFA_TULLN	40	65	80	20
2013	TU_FG_2013	FG	1	L_13	RAGT	42	385	75	70
2013	TU_FG_2013	FG	1	L_3	DESPREZ	36	241	75	75
2013	TU_FG_2013	FG	1	Laurier	VARIETY	34	385	70	95
2013	TU_FG_2013	FG	1	1308.2.5_P1	IFA_TULLN	36	92	85	40
2013	TU_FG_2013	FG	1	Lyrik	VARIETY	NA	NA	70	60
2013	TU_FG_2013	FG	1	L_9	DESPREZ	28	120.4	70	95
2013	TU_FG_2013	FG	1	L_8	DESPREZ	38	445	70	40
2013	TU_FG_2013	FG	1	Noblesko	VARIETY	40	365	75	75
2013	TU_FG_2013	FG	1	Arezzo	VARIETY	34	208	70	100
2013	TU_FG_2013	FG	1	1305.6.5_P1	IFA_TULLN	40	30.4	100	15
2013	TU_FG_2013	FG	1	L_14	RAGT	31	301.4	70	65
2013	TU_FG_2013	FG	1	L_7	DESPREZ	38	142	80	10
2013	TU_FG_2013	FG	1	1354.2.2_P2	IFA_TULLN	34	78.4	95	90
2013	TU_FG_2013	FG	1	Karillon	VARIETY	34	268	75	25
2013	TU_FG_2013	FG	1	Basmati	VARIETY	28	160.4	70	70
2013	TU_FG_2013	FG	1	1304.4.8_P1	IFA_TULLN	31	128.4	90	25
2013	TU_FG_2013	FG	1	L_10	DESPREZ	31	223	70	85
2013	TU_FG_2013	FG	1	Fairplay	VARIETY	42	310	75	30
2013	TU_FG_2013	FG	1	Bergamo	VARIETY	42	230	80	35
2013	TU_FG_2013	FG	1	Ronsard	VARIETY	31	403	56	45
2013	TU_FG_2013	FG	1	L_5	DESPREZ	28	180.4	75	85
2013	TU_FG_2013	FG	1	Joker	VARIETY	40	162	80	40
2013	TU_FG_2013	FG	1	Allez_y	VARIETY	38	490	80	40
2013	TU_FG_2013	FG	1	L_15	RAGT	28	140.4	70	60
2013	TU_FG_2013	FG	1	Bonifacio	VARIETY	31	285	75	65
2013	TU_FG_2013	FG	1	Cavalino	VARIETY	34	240	75	95
2013	TU_FG_2013	FG	1	L_4	DESPREZ	38	345	80	40
2013	TU_FG_2013	FG	1	1309.2.4_P1	IFA_TULLN	44	40.8	105	20
2013	TU_FG_2013	FG	1	Arkeos	VARIETY	31	373	75	95
2013	TU_FG_2013	FG	1	Rubisko	VARIETY	31	220.4	70	100
2013	TU_FG_2013	FG	1	L_6	DESPREZ	28	183	65	75
2013	TU_FG_2013	FG	1	Ascott	VARIETY	34	370	65	80
2013	TU_FG_2013	FG	1	L_12	RAGT	34	381	70	50
2013	TU_FG_2013	FG	1	1351.5.10_P2	IFA_TULLN	42	40.8	100	10
2013	TU_FG_2013	FG	1	L_1	DESPREZ	28	142	65	45
2013	TU_FG_2013	FG	1	20568.1.3	IFA_TULLN	34	20.4	85	15
2013	TU_FG_2013	FG	1	Azzerti	VARIETY	38	365	75	45
2013	TU_FG_2013	FG	1	CH761525	VARIETY	38	237	85	35
2013	TU_FG_2013	FG	1	Kalystar	VARIETY	38	213	75	25
2013	TU_FG_2013	FG	1	BIO_110	IFA_TULLN	36	230	70	55
2013	TU_FG_2013	FG	1	Apache	VARIETY	34	213	65	5
2013	TU_FG_2013	FG	1	Toisondor	VARIETY	38	430	60	80
2013	TU_FG_2013	FG	1	Renan	VARIETY	36	155	75	30
2013	TU_FG_2013	FG	1	Phare	VARIETY	38	330	70	65
2013	TU_FG_2013	FG	1	Nogal	VARIETY	28	210	70	95
2013	TU_FG_2013	FG	1	Miroir	VARIETY	28	132.4	70	50
2013	TU_FG_2013	FG	1	Alixan	VARIETY	34	249	70	45
2013	TU_FG_2013	FG	1	Manager	VARIETY	40	205	80	35
2013	TU_FG_2013	FG	1	Bagou	VARIETY	34	590	65	60
2013	TU_FG_2013	FG	1	Nuage	VARIETY	38	281	70	35
2013	TU_FG_2013	FG	1	20818.1.2	IFA_TULLN	34	20	90	75
2013	TU_FG_2013	FG	1	20812.2.2	IFA_TULLN	34	20	90	50
2013	TU_FG_2013	FG	1	Adagio	VARIETY	28	160.4	70	30
2013	TU_FG_2013	FG	1	Tobak	VARIETY	40	330	80	75
2013	TU_FG_2013	FG	1	Barok	VARIETY	31	202	70	50
2013	TU_FG_2013	FG	1	RHT_216	IFA_TULLN	36	82.4	80	20
2013	TU_FG_2013	FG	1	Arlequin	VARIETY	38	310	70	30
2013	TU_FG_2013	FG	1	BIO_4036	IFA_TULLN	28	110	75	20
2013	TU_FG_2013	FG	1	K9_21_AB.18	IFA_TULLN	28	78.4	70	35
2013	TU_FG_2013	FG	1	Ambello	VARIETY	28	68.4	75	100
2013	TU_FG_2013	FG	1	BIO_5019	IFA_TULLN	38	221	70	55
2013	TU_FG_2013	FG	1	Graindor	VARIETY	28	108.4	70	5
2013	TU_FG_2013	FG	1	Accroc	VARIETY	28	172.4	65	65
2013	TU_FG_2013	FG	1	Chevalier	VARIETY	40	225	80	55
2013	TU_FG_2013	FG	1	Mercato	VARIETY	28	132.4	60	80
2013	TU_FG_2013	FG	1	UNG_136.16.7.4.7	IFA_TULLN	34	16.4	90	0
2013	TU_FG_2013	FG	1	L_2	DESPREZ	34	199	70	60
2013	TU_FG_2013	FG	1	Oxebo	VARIETY	38	173	75	10
2013	TU_FG_2013	FG	1	Mendel	VARIETY	38	410	65	50
2013	TU_FG_2013	FG	1	Royssac	VARIETY	28	264	60	55
2013	TU_FG_2013	FG	1	Goncourt	VARIETY	31	262	65	85
2013	TU_FG_2013	FG	1	A40_22_1_2	IFA_TULLN	38	52	85	15
2013	TU_FG_2013	FG	1	Cordiale	VARIETY	38	270	65	20
2013	TU_FG_2013	FG	1	Altigo	VARIETY	34	341	80	80
2013	TU_FG_2013	FG	1	Boregar	VARIETY	36	401	65	45
2013	TU_FG_2013	FG	1	Compil	VARIETY	38	305	65	50
2013	TU_FG_2013	FG	1	A39.9.2.1	IFA_TULLN	42	18	85	10
2013	TU_FG_2013	FG	1	Midas	VARIETY	38	225	80	40
2013	TU_FG_2013	FG	1	Premio	VARIETY	34	341	70	100
2013	TU_FG_2013	FG	1	Sokal	VARIETY	34	233	70	25
2013	TU_FG_2013	FG	1	Isengrain	VARIETY	34	305	65	85
2013	TU_FG_2013	FG	1	Musik	VARIETY	34	341	55	95
2013	TU_FG_2013	FG	1	Aligator	VARIETY	34	245	70	60
2013	TU_FG_2013	FG	1	RHT_269	IFA_TULLN	31	110.4	80	55
2013	TU_FG_2013	FG	1	Pakito	VARIETY	28	122.4	70	50
2013	TU_FG_2013	FG	1	Tulip	VARIETY	28	160.4	75	45
2013	TU_FG_2013	FG	1	Azzuro	VARIETY	38	238	80	30
2013	TU_FG_2013	FG	1	Fluor	VARIETY	38	277	80	15
2013	TU_FG_2013	FG	1	BIO_719	IFA_TULLN	28	118.4	75	50
2013	TU_FG_2013	FG	1	Timber	VARIETY	42	430	70	65
2013	TU_FG_2013	FG	1	K11_16_AB.9	IFA_TULLN	40	92	85	20
2013	TU_FG_2013	FG	1	Capo	VARIETY	38	155	95	10
2011	TU_FG_2011	FG	4	20818.1.2	IFA_TULLN	27	1	90	37.5
2011	TU_FG_2011	FG	4	Timber	VARIETY	29	730	70	100
2011	TU_FG_2011	FG	4	Toisondor	VARIETY	25	700	65	75
2011	TU_FG_2011	FG	4	Boregar	VARIETY	23	324	70	50
2011	TU_FG_2011	FG	4	Premio	VARIETY	23	106.4	70	62.5
2011	TU_FG_2011	FG	4	Mercato	VARIETY	23	96.4	70	75
2011	TU_FG_2011	FG	4	20568.1.3	IFA_TULLN	23	3	95	12.5
2011	TU_FG_2011	FG	4	Royssac	VARIETY	23	465	70	87.5
2011	TU_FG_2011	FG	4	Alixan	VARIETY	25	172	70	25
2011	TU_FG_2011	FG	4	Midas	VARIETY	25	34.8	85	50
2011	TU_FG_2011	FG	4	Aligator	VARIETY	23	66.4	75	25
2011	TU_FG_2011	FG	4	Nuage	VARIETY	27	234	70	50
2011	TU_FG_2011	FG	4	20812.2.2	IFA_TULLN	27	1	90	12.5
2011	TU_FG_2011	FG	4	Mendel	VARIETY	27	337	65	100
2011	TU_FG_2011	FG	4	Chevalier	VARIETY	29	167	80	50
2011	TU_FG_2011	FG	4	Apache	VARIETY	23	100	70	0
2011	TU_FG_2011	FG	4	Bagou	VARIETY	23	253	70	100
2011	TU_FG_2011	FG	4	Altigo	VARIETY	25	235.2	80	50
2011	TU_FG_2011	FG	4	Isengrain	VARIETY	23	84.4	75	75
2011	TU_FG_2011	FG	4	A39.9.2.1	IFA_TULLN	31	22.8	85	12.5
2011	TU_FG_2011	FG	4	Cordiale	VARIETY	27	342	65	75
2011	TU_FG_2011	FG	4	Arlequin	VARIETY	23	181.8	75	50
2011	TU_FG_2011	FG	4	Renan	VARIETY	27	51.4	90	50
2011	TU_FG_2011	FG	4	Capo	VARIETY	27	52.4	100	37.5
2011	TU_FG_2011	FG	4	Barok	VARIETY	25	156	75	25
2011	TU_FG_2011	FG	4	Azzuro	VARIETY	27	144.4	80	37.5
2013	TU_FS_2013	FS	1	Karillon	VARIETY	38	301	70	75
2013	TU_FS_2013	FS	1	L_15	RAGT	28	52.4	70	65
2013	TU_FS_2013	FS	1	L_14	RAGT	28	122	65	50
2013	TU_FS_2013	FS	1	L_3	DESPREZ	34	79.4	75	90
2013	TU_FS_2013	FS	1	Rubisko	VARIETY	28	30.4	60	70
2013	TU_FS_2013	FS	1	Arezzo	VARIETY	34	104.4	65	95
2013	TU_FS_2013	FS	1	Bergamo	VARIETY	40	101.4	75	45
2013	TU_FS_2013	FS	1	L_5	DESPREZ	28	50.8	70	85
2013	TU_FS_2013	FS	1	1354.2.2_P2	IFA_TULLN	34	14	85	85
2013	TU_FS_2013	FS	1	1351.5.10_P2	IFA_TULLN	40	10	85	15
2013	TU_FS_2013	FS	1	Arkeos	VARIETY	31	162	65	85
2013	TU_FS_2013	FS	1	Ascott	VARIETY	28	31.2	60	75
2013	TU_FS_2013	FS	1	1314.3.11_P1	IFA_TULLN	40	39.4	80	40
2013	TU_FS_2013	FS	1	Joker	VARIETY	40	85	80	75
2013	TU_FS_2013	FS	1	L_10	DESPREZ	28	28.8	65	95
2013	TU_FS_2013	FS	1	Cavalino	VARIETY	31	74.4	70	100
2013	TU_FS_2013	FS	1	1304.4.8_P1	IFA_TULLN	31	70.4	85	40
2013	TU_FS_2013	FS	1	Basmati	VARIETY	28	30.4	60	75
2013	TU_FS_2013	FS	1	L_7	DESPREZ	38	34	70	60
2013	TU_FS_2013	FS	1	1309.2.4_P1	IFA_TULLN	44	24.4	100	45
2013	TU_FS_2013	FS	1	L_6	DESPREZ	28	32.8	65	80
2013	TU_FS_2013	FS	1	1308.2.5_P1	IFA_TULLN	34	14	85	45
2013	TU_FS_2013	FS	1	Bonifacio	VARIETY	28	22	70	80
2013	TU_FS_2013	FS	1	Laurier	VARIETY	36	133	75	100
2013	TU_FS_2013	FS	1	1305.6.5_P1	IFA_TULLN	40	70.4	95	25
2013	TU_FS_2013	FS	1	Sy_Moisson	VARIETY	31	74.4	70	90
2013	TU_FS_2013	FS	1	Fairplay	VARIETY	40	102	70	80
2013	TU_FS_2013	FS	1	Noblesko	VARIETY	40	115	70	70
2013	TU_FS_2013	FS	1	L_12	RAGT	36	102	70	75
2013	TU_FS_2013	FS	1	L_4	DESPREZ	38	60	80	85
2013	TU_FS_2013	FS	1	Lyrik	VARIETY	34	109.4	70	90
2013	TU_FS_2013	FS	1	L_11	RAGT	31	160.4	65	100
2013	TU_FS_2013	FS	1	L_8	DESPREZ	40	135	65	80
2013	TU_FS_2013	FS	1	Calabro	VARIETY	31	212	65	100
2013	TU_FS_2013	FS	1	L_9	DESPREZ	34	131.4	70	80
2013	TU_FS_2013	FS	1	Allez_y	VARIETY	40	191	85	90
2013	TU_FS_2013	FS	1	L_13	RAGT	40	101	80	100
2013	TU_FS_2013	FS	1	Ronsard	VARIETY	31	72.4	65	65
2013	TU_FS_2013	FS	1	Royssac	VARIETY	31	183	60	100
2013	TU_FS_2013	FS	1	Aligator	VARIETY	36	115	65	40
2013	TU_FS_2013	FS	1	BIO_719	IFA_TULLN	28	24.8	70	55
2013	TU_FS_2013	FS	1	BIO_4036	IFA_TULLN	28	38	75	40
2013	TU_FS_2013	FS	1	Sokal	VARIETY	36	140.4	65	15
2013	TU_FS_2013	FS	1	Cordiale	VARIETY	38	149	65	85
2013	TU_FS_2013	FS	1	Kalystar	VARIETY	40	143	70	15
2013	TU_FS_2013	FS	1	Nuage	VARIETY	38	93	75	95
2013	TU_FS_2013	FS	1	20812.2.2	IFA_TULLN	36	52	95	50
2013	TU_FS_2013	FS	1	Pakito	VARIETY	28	28	70	35
2013	TU_FS_2013	FS	1	20568.1.3	IFA_TULLN	34	40.8	85	30
2013	TU_FS_2013	FS	1	Toisondor	VARIETY	38	221	65	100
2013	TU_FS_2013	FS	1	Altigo	VARIETY	31	163	80	95
2013	TU_FS_2013	FS	1	A40_22_1_2	IFA_TULLN	38	1.8	85	5
2013	TU_FS_2013	FS	1	Azzerti	VARIETY	38	169	65	80
2013	TU_FS_2013	FS	1	Bagou	VARIETY	34	209	65	100
2013	TU_FS_2013	FS	1	Compil	VARIETY	38	257	70	95
2013	TU_FS_2013	FS	1	Adagio	VARIETY	28	52	70	55
2013	TU_FS_2013	FS	1	Chevalier	VARIETY	40	81	80	60
2013	TU_FS_2013	FS	1	Nogal	VARIETY	28	54.4	65	75
2013	TU_FS_2013	FS	1	Tulip	VARIETY	31	122	75	70
2013	TU_FS_2013	FS	1	Graindor	VARIETY	28	38.4	75	20
2013	TU_FS_2013	FS	1	A39.9.2.1	IFA_TULLN	40	4.8	80	0
2013	TU_FS_2013	FS	1	Accroc	VARIETY	28	32	65	90
2013	TU_FS_2013	FS	1	Timber	VARIETY	42	171	70	100
2013	TU_FS_2013	FS	1	Tobak	VARIETY	40	161	75	95
2013	TU_FS_2013	FS	1	BIO_5019	IFA_TULLN	38	123	75	90
2013	TU_FS_2013	FS	1	Ambello	VARIETY	28	22	70	100
2013	TU_FS_2013	FS	1	RHT_216	IFA_TULLN	34	34	75	80
2013	TU_FS_2013	FS	1	Miroir	VARIETY	28	44.4	70	35
2013	TU_FS_2013	FS	1	Phare	VARIETY	40	161	70	95
2013	TU_FS_2013	FS	1	Mercato	VARIETY	28	46	60	100
2013	TU_FS_2013	FS	1	Renan	VARIETY	38	84	75	50
2013	TU_FS_2013	FS	1	L_1	DESPREZ	28	60.8	65	10
2013	TU_FS_2013	FS	1	20818.1.2	IFA_TULLN	34	3	85	60
2013	TU_FS_2013	FS	1	Capo	VARIETY	38	36.4	90	50
2013	TU_FS_2013	FS	1	Alixan	VARIETY	38	153	70	95
2013	TU_FS_2013	FS	1	K9_21_AB.18	IFA_TULLN	31	130.4	70	40
2013	TU_FS_2013	FS	1	Oxebo	VARIETY	38	52.4	70	75
2013	TU_FS_2013	FS	1	Midas	VARIETY	38	104	80	80
2013	TU_FS_2013	FS	1	Azzuro	VARIETY	40	91	75	30
2013	TU_FS_2013	FS	1	BIO_110	IFA_TULLN	34	72.4	75	65
2013	TU_FS_2013	FS	1	CH761525	VARIETY	38	97	90	45
2013	TU_FS_2013	FS	1	RHT_269	IFA_TULLN	31	100.4	80	85
2013	TU_FS_2013	FS	1	Arlequin	VARIETY	34	123	70	30
2013	TU_FS_2013	FS	1	Mendel	VARIETY	38	149	65	100
2013	TU_FS_2013	FS	1	Isengrain	VARIETY	36	163	70	100
2013	TU_FS_2013	FS	1	L_2	DESPREZ	36	132	70	55
2013	TU_FS_2013	FS	1	Fluor	VARIETY	38	99	75	35
2013	TU_FS_2013	FS	1	Manager	VARIETY	40	78.4	75	55
2013	TU_FS_2013	FS	1	Goncourt	VARIETY	31	124	70	100
2013	TU_FS_2013	FS	1	UNG_136.16.7.4.7	IFA_TULLN	34	4.4	90	0
2013	TU_FS_2013	FS	1	Barok	VARIETY	36	141.4	70	15
2013	TU_FS_2013	FS	1	Apache	VARIETY	31	60.8	70	20
2013	TU_FS_2013	FS	1	K11_16_AB.9	IFA_TULLN	38	114.4	85	50
2013	TU_FS_2013	FS	1	Musik	VARIETY	31	120.4	55	60
2013	TU_FS_2013	FS	1	Premio	VARIETY	34	103.4	70	90
2013	TU_FS_2013	FS	1	Boregar	VARIETY	34	105	70	75
2012	TU_FG_2012	FG	2	A40_22_1_2	IFA_TULLN	27	2.6	80	20
2012	TU_FG_2012	FG	2	20818.1.2	IFA_TULLN	27	1.4	80	45
2012	TU_FG_2012	FG	2	Cordiale	VARIETY	27	10	55	100
2012	TU_FG_2012	FG	2	Kalystar	VARIETY	31	12	70	10
2012	TU_FG_2012	FG	2	CH761525	VARIETY	31	56	80	50
2012	TU_FG_2012	FG	2	A39.9.2.1	IFA_TULLN	31	4	80	0
2012	TU_FG_2012	FG	2	Musik	VARIETY	27	87	50	100
2012	TU_FG_2012	FG	2	Mercato	VARIETY	25	31.6	55	95
2012	TU_FG_2012	FG	2	Azzuro	VARIETY	31	66	80	90
2012	TU_FG_2012	FG	2	Altigo	VARIETY	25	74	70	95
2012	TU_FG_2012	FG	2	Goncourt	VARIETY	25	124.4	70	100
2012	TU_FG_2012	FG	2	BIO_719	IFA_TULLN	23	5.4	65	90
2012	TU_FG_2012	FG	2	RHT_269	IFA_TULLN	27	4.6	70	75
2012	TU_FG_2012	FG	2	L_2	DESPREZ	27	44	70	80
2012	TU_FG_2012	FG	2	Arlequin	VARIETY	27	85	70	65
2012	TU_FG_2012	FG	2	Tulip	VARIETY	25	34.4	70	80
2012	TU_FG_2012	FG	2	Compil	VARIETY	27	128	65	65
2012	TU_FG_2012	FG	2	Nuage	VARIETY	31	103.4	70	85
2012	TU_FG_2012	FG	2	Toisondor	VARIETY	31	362	60	80
2012	TU_FG_2012	FG	2	K11_16_AB.9	IFA_TULLN	31	5.8	80	40
2012	TU_FG_2012	FG	2	Adagio	VARIETY	23	6	60	40
2012	TU_FG_2012	FG	2	Capo	VARIETY	25	2.4	70	70
2012	TU_FG_2012	FG	2	20568.1.3	IFA_TULLN	25	0	80	15
2012	TU_FG_2012	FG	2	BIO_110	IFA_TULLN	27	114	65	45
2012	TU_FG_2012	FG	2	Manager	VARIETY	33	69.4	75	75
2012	TU_FG_2012	FG	2	Mendel	VARIETY	27	94	60	100
2012	TU_FG_2012	FG	2	RHT_216	IFA_TULLN	27	0	65	85
2012	TU_FG_2012	FG	2	Pakito	VARIETY	25	18.4	65	90
2012	TU_FG_2012	FG	2	Miroir	VARIETY	23	10	60	40
2012	TU_FG_2012	FG	2	Aligator	VARIETY	25	24.4	60	45
2012	TU_FG_2012	FG	2	Oxebo	VARIETY	31	26	70	75
2012	TU_FG_2012	FG	2	Barok	VARIETY	27	28	65	60
2012	TU_FG_2012	FG	2	Azzerti	VARIETY	31	122	65	100
2012	TU_FG_2012	FG	2	Chevalier	VARIETY	31	34	70	50
2012	TU_FG_2012	FG	2	Midas	VARIETY	29	15.2	75	55
2012	TU_FG_2012	FG	2	Sokal	VARIETY	27	29.6	65	20
2012	TU_FG_2012	FG	2	Apache	VARIETY	25	6.4	65	10
2012	TU_FG_2012	FG	2	Bagou	VARIETY	31	192	60	100
2012	TU_FG_2012	FG	2	Phare	VARIETY	31	161	65	90
2012	TU_FG_2012	FG	2	Nogal	VARIETY	23	87	60	80
2012	TU_FG_2012	FG	2	Timber	VARIETY	33	406	65	100
2012	TU_FG_2012	FG	2	Ambello	VARIETY	25	33.2	65	85
2012	TU_FG_2012	FG	2	Graindor	VARIETY	25	36.4	65	25
2012	TU_FG_2012	FG	2	Premio	VARIETY	25	38.4	60	95
2012	TU_FG_2012	FG	2	BIO_4036	IFA_TULLN	23	4.6	70	65
2012	TU_FG_2012	FG	2	Renan	VARIETY	27	10	70	55
2012	TU_FG_2012	FG	2	Tobak	VARIETY	31	83	75	80
2012	TU_FG_2012	FG	2	L_1	DESPREZ	25	45.6	70	45
2012	TU_FG_2012	FG	2	Fluor	VARIETY	27	14.8	75	45
2012	TU_FG_2012	FG	2	20812.2.2	IFA_TULLN	27	0	80	60
2012	TU_FG_2012	FG	2	BIO_5019	IFA_TULLN	29	68.4	70	70
2012	TU_FG_2012	FG	2	Royssac	VARIETY	25	135	60	100
2012	TU_FG_2012	FG	2	Isengrain	VARIETY	27	121	65	100
2012	TU_FG_2012	FG	2	K9_21_AB.18	IFA_TULLN	25	4.6	75	15
2012	TU_FG_2012	FG	2	Alixan	VARIETY	25	18	65	80
2012	TU_FG_2012	FG	2	Accroc	VARIETY	25	121.6	60	100
2012	TU_FG_2012	FG	2	Boregar	VARIETY	27	136	60	85
2012	TU_FG_2012	FG	2	UNG_136.16.7.4.7	IFA_TULLN	27	0	80	20
2014	TU_FC_2014	FC	1	Rubisko	VARIETY	24	195	75	80
2014	TU_FC_2014	FC	1	Arezzo	VARIETY	22	214	75	100
2014	TU_FC_2014	FC	1	Boregar	VARIETY	22	383	75	70
2014	TU_FC_2014	FC	1	L_11	RAGT	24	852	75	85
2014	TU_FC_2014	FC	1	Toisondor	VARIETY	24	862	75	95
2014	TU_FC_2014	FC	1	L_6	DESPREZ	22	301	75	50
2014	TU_FC_2014	FC	1	Musik	VARIETY	22	565	75	75
2014	TU_FC_2014	FC	1	Miroir	VARIETY	22	76	80	35
2014	TU_FC_2014	FC	1	L_4	DESPREZ	24	203	80	50
2014	TU_FC_2014	FC	1	L_8	DESPREZ	26	401	80	100
2014	TU_FC_2014	FC	1	Basmati	VARIETY	22	401	80	50
2014	TU_FC_2014	FC	1	Apache	VARIETY	24	102	80	5
2014	TU_FC_2014	FC	1	Aligator	VARIETY	24	146	80	35
2014	TU_FC_2014	FC	1	Kalystar	VARIETY	26	214	80	30
2014	TU_FC_2014	FC	1	L_14	RAGT	22	220	80	38
2014	TU_FC_2014	FC	1	Mercato	VARIETY	22	242	80	100
2014	TU_FC_2014	FC	1	Barok	VARIETY	24	182	80	30
2014	TU_FC_2014	FC	1	L_9	DESPREZ	24	600	80	65
2014	TU_FC_2014	FC	1	Calabro	VARIETY	22	381	80	100
2014	TU_FC_2014	FC	1	Arkeos	VARIETY	22	369	80	95
2014	TU_FC_2014	FC	1	Arlequin	VARIETY	24	243	80	10
2014	TU_FC_2014	FC	1	Premio	VARIETY	24	542	80	75
2014	TU_FC_2014	FC	1	L_15	RAGT	22	565	80	60
2014	TU_FC_2014	FC	1	Ascott	VARIETY	24	499	80	85
2014	TU_FC_2014	FC	1	L_12	RAGT	26	820	80	95
2014	TU_FC_2014	FC	1	Laurier	VARIETY	24	785	80	100
2014	TU_FC_2014	FC	1	Royssac	VARIETY	24	740	80	95
2014	TU_FC_2014	FC	1	Cordiale	VARIETY	26	460	80	90
2014	TU_FC_2014	FC	1	Alixan	VARIETY	24	471	80	80
2014	TU_FC_2014	FC	1	Ronsard	VARIETY	22	329	80	85
2014	TU_FC_2014	FC	1	Pakito	VARIETY	22	245	80	60
2014	TU_FC_2014	FC	1	BIO_5019	IFA_TULLN	26	285	80	75
2014	TU_FC_2014	FC	1	Adagio	VARIETY	20	90.8	80	15
2014	TU_FC_2014	FC	1	Cavalino	VARIETY	24	341	80	90
2014	TU_FC_2014	FC	1	Compil	VARIETY	24	563	80	58
2014	TU_FC_2014	FC	1	Mendel	VARIETY	24	363	80	95
2014	TU_FC_2014	FC	1	Sokal	VARIETY	24	193	80	0
2014	TU_FC_2014	FC	1	Nogal	VARIETY	20	54.4	85	45
2014	TU_FC_2014	FC	1	K9_21_AB.18	IFA_TULLN	24	25	85	35
2014	TU_FC_2014	FC	1	L_2	DESPREZ	24	202	85	73
2014	TU_FC_2014	FC	1	BIO_719	IFA_TULLN	24	48.4	85	25
2014	TU_FC_2014	FC	1	Ambello	VARIETY	22	92.4	85	75
2014	TU_FC_2014	FC	1	Fluor	VARIETY	24	81.8	85	10
2014	TU_FC_2014	FC	1	Tulip	VARIETY	22	265	85	90
2014	TU_FC_2014	FC	1	Bergamo	VARIETY	26	125	85	40
2014	TU_FC_2014	FC	1	Goncourt	VARIETY	22	385	85	100
2014	TU_FC_2014	FC	1	L_1	DESPREZ	22	146	85	10
2014	TU_FC_2014	FC	1	BIO_110	IFA_TULLN	24	60.4	85	20
2014	TU_FC_2014	FC	1	L_10	DESPREZ	22	305	85	100
2014	TU_FC_2014	FC	1	L_13	RAGT	26	189	85	95
2014	TU_FC_2014	FC	1	Bagou	VARIETY	24	523	85	95
2014	TU_FC_2014	FC	1	Phare	VARIETY	26	520	85	95
2014	TU_FC_2014	FC	1	Nuage	VARIETY	26	500	85	30
2014	TU_FC_2014	FC	1	Accroc	VARIETY	22	294	85	90
2014	TU_FC_2014	FC	1	L_7	DESPREZ	26	285	85	40
2014	TU_FC_2014	FC	1	Timber	VARIETY	26	476	85	95
2014	TU_FC_2014	FC	1	Altigo	VARIETY	22	375	85	85
2014	TU_FC_2014	FC	1	Isengrain	VARIETY	24	612	85	60
2014	TU_FC_2014	FC	1	Karillon	VARIETY	24	371	85	90
2014	TU_FC_2014	FC	1	Tobak	VARIETY	28	154	90	100
2014	TU_FC_2014	FC	1	Renan	VARIETY	24	43.4	90	35
2014	TU_FC_2014	FC	1	Joker	VARIETY	26	77	90	100
2014	TU_FC_2014	FC	1	Sy_Moisson	VARIETY	22	159	90	50
2014	TU_FC_2014	FC	1	Noblesko	VARIETY	28	449	90	100
2014	TU_FC_2014	FC	1	Chevalier	VARIETY	28	192	90	80
2014	TU_FC_2014	FC	1	L_3	DESPREZ	24	382	90	80
2014	TU_FC_2014	FC	1	Graindor	VARIETY	24	72.4	90	0
2014	TU_FC_2014	FC	1	Fairplay	VARIETY	30	277	90	95
2014	TU_FC_2014	FC	1	L_5	DESPREZ	22	165	90	40
2014	TU_FC_2014	FC	1	Azzerti	VARIETY	28	395	90	85
2014	TU_FC_2014	FC	1	Bonifacio	VARIETY	22	169	90	35
2014	TU_FC_2014	FC	1	Azzuro	VARIETY	26	245	90	15
2014	TU_FC_2014	FC	1	Allez_y	VARIETY	26	780	90	100
2014	TU_FC_2014	FC	1	Oxebo	VARIETY	26	169	90	85
2014	TU_FC_2014	FC	1	BIO_4036	IFA_TULLN	22	27.8	95	15
2014	TU_FC_2014	FC	1	A39.9.2.1	IFA_TULLN	28	58	95	15
2014	TU_FC_2014	FC	1	1314.3.11_P1	IFA_TULLN	28	2.2	95	35
2014	TU_FC_2014	FC	1	RHT_216	IFA_TULLN	26	3.6	95	65
2014	TU_FC_2014	FC	1	Manager	VARIETY	28	81	95	55
2014	TU_FC_2014	FC	1	1354.2.2_P2	IFA_TULLN	26	3.8	100	73
2014	TU_FC_2014	FC	1	K11_16_AB.9	IFA_TULLN	26	81.4	100	30
2014	TU_FC_2014	FC	1	Lyrik	VARIETY	24	125	100	80
2014	TU_FC_2014	FC	1	RHT_269	IFA_TULLN	22	53	100	40
2014	TU_FC_2014	FC	1	1351.5.10_P2	IFA_TULLN	30	1.8	105	20
2014	TU_FC_2014	FC	1	CH761525	VARIETY	26	424	105	30
2014	TU_FC_2014	FC	1	1308.2.5_P1	IFA_TULLN	26	37	105	20
2014	TU_FC_2014	FC	1	1305.6.5_P1	IFA_TULLN	26	1	110	10
2014	TU_FC_2014	FC	1	20568.1.3	IFA_TULLN	24	1.4	110	0
2014	TU_FC_2014	FC	1	Midas	VARIETY	26	73.4	110	20
2014	TU_FC_2014	FC	1	20818.1.2	IFA_TULLN	26	1	110	25
2014	TU_FC_2014	FC	1	20812.2.2	IFA_TULLN	26	0	110	25
2014	TU_FC_2014	FC	1	Capo	VARIETY	26	82.4	110	30
2014	TU_FC_2014	FC	1	1304.4.8_P1	IFA_TULLN	24	36	115	10
2014	TU_FC_2014	FC	1	A40_22_1_2	IFA_TULLN	26	3.2	120	5
2014	TU_FC_2014	FC	1	UNG_136.16.7.4.7	IFA_TULLN	26	1	120	0
2014	TU_FC_2014	FC	1	1309.2.4_P1	IFA_TULLN	28	5	125	25
2015	TU_FC_2015	FC	1	Cordiale	VARIETY	32	418	70	85
2015	TU_FC_2015	FC	1	L_14	RAGT	28	210.4	70	70
2015	TU_FC_2015	FC	1	Alixan	VARIETY	30	425	75	65
2015	TU_FC_2015	FC	1	BIO_5019	IFA_TULLN	32	253	75	80
2015	TU_FC_2015	FC	1	Musik	VARIETY	30	771	65	100
2015	TU_FC_2015	FC	1	Mercato	VARIETY	28	285	70	85
2015	TU_FC_2015	FC	1	Karillon	VARIETY	32	530	80	70
2015	TU_FC_2015	FC	1	1354.2.2_P2	IFA_TULLN	32	3.2	95	80
2015	TU_FC_2015	FC	1	Kalystar	VARIETY	32	160	75	15
2015	TU_FC_2015	FC	1	L_6	DESPREZ	28	601	70	40
2015	TU_FC_2015	FC	1	Goncourt	VARIETY	32	900	75	100
2015	TU_FC_2015	FC	1	1304.4.8_P1	IFA_TULLN	30	19.8	100	5
2015	TU_FC_2015	FC	1	L_15	RAGT	30	393	75	65
2015	TU_FC_2015	FC	1	Premio	VARIETY	32	680	75	85
2015	TU_FC_2015	FC	1	Azzuro	VARIETY	32	169	85	30
2015	TU_FC_2015	FC	1	Arkeos	VARIETY	32	720	70	95
2015	TU_FC_2015	FC	1	Azzerti	VARIETY	34	358	80	95
2015	TU_FC_2015	FC	1	Renan	VARIETY	32	83	80	35
2015	TU_FC_2015	FC	1	Bergamo	VARIETY	34	202	80	55
2015	TU_FC_2015	FC	1	1305.6.5_P1	IFA_TULLN	34	6.4	100	10
2015	TU_FC_2015	FC	1	Accroc	VARIETY	30	471	70	65
2015	TU_FC_2015	FC	1	L_4	DESPREZ	34	213	80	35
2015	TU_FC_2015	FC	1	Calabro	VARIETY	32	480	75	95
2015	TU_FC_2015	FC	1	Ascott	VARIETY	30	379	70	85
2015	TU_FC_2015	FC	1	L_8	DESPREZ	34	460	75	35
2015	TU_FC_2015	FC	1	L_3	DESPREZ	30	60	80	65
2015	TU_FC_2015	FC	1	Nuage	VARIETY	34	558	75	70
2015	TU_FC_2015	FC	1	Fluor	VARIETY	32	153	80	30
2015	TU_FC_2015	FC	1	Joker	VARIETY	34	122	90	55
2015	TU_FC_2015	FC	1	Timber	VARIETY	34	330	70	90
2015	TU_FC_2015	FC	1	BIO_4036	IFA_TULLN	30	23	85	5
2015	TU_FC_2015	FC	1	Aligator	VARIETY	32	157	75	25
2015	TU_FC_2015	FC	1	Toisondor	VARIETY	32	880	70	100
2015	TU_FC_2015	FC	1	20568.1.3	IFA_TULLN	32	1.4	95	10
2015	TU_FC_2015	FC	1	L_1	DESPREZ	30	153	75	15
2015	TU_FC_2015	FC	1	L_10	DESPREZ	30	309	75	90
2015	TU_FC_2015	FC	1	RHT_269	IFA_TULLN	32	1.4	90	15
2015	TU_FC_2015	FC	1	Tobak	VARIETY	36	370	85	95
2015	TU_FC_2015	FC	1	Royssac	VARIETY	30	1040	80	90
2015	TU_FC_2015	FC	1	Sy_Moisson	VARIETY	30	34.4	85	50
2015	TU_FC_2015	FC	1	Nogal	VARIETY	28	145	75	75
2015	TU_FC_2015	FC	1	UNG_136.16.7.4.7	IFA_TULLN	32	1.4	105	5
2015	TU_FC_2015	FC	1	Ambello	VARIETY	30	88	80	80
2015	TU_FC_2015	FC	1	L_12	RAGT	30	390	75	75
2015	TU_FC_2015	FC	1	L_5	DESPREZ	28	80.4	75	80
2015	TU_FC_2015	FC	1	Cavalino	VARIETY	30	95	80	90
2015	TU_FC_2015	FC	1	Compil	VARIETY	32	350	70	50
2015	TU_FC_2015	FC	1	Adagio	VARIETY	28	82	75	5
2015	TU_FC_2015	FC	1	K11_16_AB.9	IFA_TULLN	32	34.8	95	25
2015	TU_FC_2015	FC	1	Barok	VARIETY	32	114	75	55
2015	TU_FC_2015	FC	1	Chevalier	VARIETY	34	174	85	50
2015	TU_FC_2015	FC	1	Midas	VARIETY	32	36	90	20
2015	TU_FC_2015	FC	1	Lyrik	VARIETY	32	179	80	90
2015	TU_FC_2015	FC	1	Apache	VARIETY	30	54	75	20
2015	TU_FC_2015	FC	1	Basmati	VARIETY	30	164	75	70
2015	TU_FC_2015	FC	1	20818.1.2	IFA_TULLN	32	0.6	100	30
2015	TU_FC_2015	FC	1	Bagou	VARIETY	32	389	75	100
2015	TU_FC_2015	FC	1	Phare	VARIETY	34	500	75	100
2015	TU_FC_2015	FC	1	20812.2.2	IFA_TULLN	32	0.6	100	15
2015	TU_FC_2015	FC	1	L_11	RAGT	30	760	65	65
2015	TU_FC_2015	FC	1	Fairplay	VARIETY	36	418	75	100
2015	TU_FC_2015	FC	1	A40_22_1_2	IFA_TULLN	32	8.4	95	0
2015	TU_FC_2015	FC	1	Arlequin	VARIETY	30	101	75	10
2015	TU_FC_2015	FC	1	Tulip	VARIETY	30	161	85	60
2015	TU_FC_2015	FC	1	Boregar	VARIETY	30	281	75	20
2015	TU_FC_2015	FC	1	Bonifacio	VARIETY	30	85	75	35
2015	TU_FC_2015	FC	1	Altigo	VARIETY	32	254	80	80
2015	TU_FC_2015	FC	1	Arezzo	VARIETY	30	80	75	95
2015	TU_FC_2015	FC	1	Oxebo	VARIETY	34	85	80	10
2015	TU_FC_2015	FC	1	Mendel	VARIETY	32	448	75	100
2015	TU_FC_2015	FC	1	BIO_719	IFA_TULLN	30	38	80	40
2015	TU_FC_2015	FC	1	Manager	VARIETY	34	161	80	60
2015	TU_FC_2015	FC	1	Rubisko	VARIETY	30	213	70	70
2015	TU_FC_2015	FC	1	Laurier	VARIETY	32	401	75	100
2015	TU_FC_2015	FC	1	L_13	RAGT	34	490	80	75
2015	TU_FC_2015	FC	1	Ronsard	VARIETY	30	308	70	35
2015	TU_FC_2015	FC	1	1351.5.10_P2	IFA_TULLN	34	8.8	100	15
2015	TU_FC_2015	FC	1	L_7	DESPREZ	34	430	75	30
2015	TU_FC_2015	FC	1	Miroir	VARIETY	28	110	70	15
2015	TU_FC_2015	FC	1	A39.9.2.1	IFA_TULLN	34	16	85	10
2015	TU_FC_2015	FC	1	Graindor	VARIETY	30	31.8	85	5
2015	TU_FC_2015	FC	1	BIO_110	IFA_TULLN	32	57	75	35
2015	TU_FC_2015	FC	1	RHT_216	IFA_TULLN	32	3.2	90	40
2015	TU_FC_2015	FC	1	K9_21_AB.18	IFA_TULLN	30	27	85	20
2015	TU_FC_2015	FC	1	1314.3.11_P1	IFA_TULLN	34	21.4	90	30
2015	TU_FC_2015	FC	1	1308.2.5_P1	IFA_TULLN	30	6.4	95	10
2015	TU_FC_2015	FC	1	Isengrain	VARIETY	30	261	80	95
2015	TU_FC_2015	FC	1	Allez_y	VARIETY	34	930	85	60
2015	TU_FC_2015	FC	1	1309.2.4_P1	IFA_TULLN	36	12.8	115	30
2015	TU_FC_2015	FC	1	Sokal	VARIETY	32	75.8	80	0
2015	TU_FC_2015	FC	1	CH761525	VARIETY	32	248	100	20
2015	TU_FC_2015	FC	1	Noblesko	VARIETY	34	231	85	90
2015	TU_FC_2015	FC	1	Pakito	VARIETY	30	214	80	75
2015	TU_FC_2015	FC	1	L_2	DESPREZ	30	143	75	45
2015	TU_FC_2015	FC	1	L_9	DESPREZ	30	202	75	45
2015	TU_FC_2015	FC	1	Capo	VARIETY	32	86.4	105	10
2011	TU_FS_2011	FS	1	Nuage	VARIETY	27	124	70	50
2011	TU_FS_2011	FS	1	Alixan	VARIETY	25	32.8	75	75
2011	TU_FS_2011	FS	1	Arlequin	VARIETY	23	14.4	75	50
2011	TU_FS_2011	FS	1	Mercato	VARIETY	23	4.4	70	50
2011	TU_FS_2011	FS	1	Premio	VARIETY	23	2.6	80	50
2011	TU_FS_2011	FS	1	Isengrain	VARIETY	23	12.8	70	75
2011	TU_FS_2011	FS	1	Altigo	VARIETY	23	36.8	75	75
2011	TU_FS_2011	FS	1	A39.9.2.1	IFA_TULLN	29	0.2	85	12.5
2011	TU_FS_2011	FS	1	Royssac	VARIETY	23	94	65	87.5
2011	TU_FS_2011	FS	1	Barok	VARIETY	25	54	70	25
2011	TU_FS_2011	FS	1	Cordiale	VARIETY	25	92	65	62.5
2011	TU_FS_2011	FS	1	Azzuro	VARIETY	27	4.6	80	37.5
2011	TU_FS_2011	FS	1	Timber	VARIETY	29	193	75	100
2011	TU_FS_2011	FS	1	Toisondor	VARIETY	25	160	65	62.5
2011	TU_FS_2011	FS	1	Aligator	VARIETY	23	20.8	75	50
2011	TU_FS_2011	FS	1	Bagou	VARIETY	23	62.8	75	100
2011	TU_FS_2011	FS	1	Mendel	VARIETY	25	94.4	75	100
2011	TU_FS_2011	FS	1	Midas	VARIETY	25	28.8	90	12.5
2011	TU_FS_2011	FS	1	20568.1.3	IFA_TULLN	23	1.4	95	25
2011	TU_FS_2011	FS	1	Boregar	VARIETY	23	14.4	75	50
2011	TU_FS_2011	FS	1	Renan	VARIETY	25	20.4	90	25
2011	TU_FS_2011	FS	1	Apache	VARIETY	23	4.8	75	12.5
2011	TU_FS_2011	FS	1	Capo	VARIETY	27	8.8	100	50
2011	TU_FS_2011	FS	1	20812.2.2	IFA_TULLN	27	1.4	95	37.5
2011	TU_FS_2011	FS	1	Chevalier	VARIETY	29	137	85	37.5
2011	TU_FS_2011	FS	1	20818.1.2	IFA_TULLN	27	0.6	100	25
2012	TU_FS_2012	FS	1	Azzerti	VARIETY	31	46.2	70	95
2012	TU_FS_2012	FS	1	BIO_4036	IFA_TULLN	23	0	70	40
2012	TU_FS_2012	FS	1	Compil	VARIETY	27	8	60	100
2012	TU_FS_2012	FS	1	20812.2.2	IFA_TULLN	29	0.2	80	60
2012	TU_FS_2012	FS	1	Arlequin	VARIETY	27	27.2	70	40
2012	TU_FS_2012	FS	1	Midas	VARIETY	27	3.8	75	85
2012	TU_FS_2012	FS	1	A39.9.2.1	IFA_TULLN	33	1	80	20
2012	TU_FS_2012	FS	1	Azzuro	VARIETY	29	10.8	70	70
2012	TU_FS_2012	FS	1	BIO_719	IFA_TULLN	23	1.4	60	80
2012	TU_FS_2012	FS	1	Musik	VARIETY	25	52.4	60	100
2012	TU_FS_2012	FS	1	Ambello	VARIETY	25	18.4	65	95
2012	TU_FS_2012	FS	1	BIO_5019	IFA_TULLN	31	32.4	65	95
2012	TU_FS_2012	FS	1	Isengrain	VARIETY	27	51	65	95
2012	TU_FS_2012	FS	1	Aligator	VARIETY	25	18.4	65	80
2012	TU_FS_2012	FS	1	Capo	VARIETY	25	1.4	70	85
2012	TU_FS_2012	FS	1	RHT_216	IFA_TULLN	27	0	70	90
2012	TU_FS_2012	FS	1	Chevalier	VARIETY	31	4.2	75	70
2012	TU_FS_2012	FS	1	Cordiale	VARIETY	29	38	65	95
2012	TU_FS_2012	FS	1	A40_22_1_2	IFA_TULLN	29	0.6	90	10
2012	TU_FS_2012	FS	1	Mendel	VARIETY	27	77	60	100
2012	TU_FS_2012	FS	1	Alixan	VARIETY	25	8.4	65	80
2012	TU_FS_2012	FS	1	Mercato	VARIETY	25	24.2	60	100
2012	TU_FS_2012	FS	1	Timber	VARIETY	31	75	65	95
2012	TU_FS_2012	FS	1	Nuage	VARIETY	29	17.4	70	70
2012	TU_FS_2012	FS	1	Accroc	VARIETY	23	155	60	100
2012	TU_FS_2012	FS	1	L_2	DESPREZ	27	4.2	70	75
2012	TU_FS_2012	FS	1	Barok	VARIETY	27	0	70	80
2012	TU_FS_2012	FS	1	Fluor	VARIETY	27	0.2	80	35
2012	TU_FS_2012	FS	1	RHT_269	IFA_TULLN	27	0	70	100
2012	TU_FS_2012	FS	1	20568.1.3	IFA_TULLN	25	0	85	0
2012	TU_FS_2012	FS	1	K11_16_AB.9	IFA_TULLN	29	3.2	85	60
2012	TU_FS_2012	FS	1	Phare	VARIETY	31	22.2	70	95
2012	TU_FS_2012	FS	1	Toisondor	VARIETY	29	137	65	95
2012	TU_FS_2012	FS	1	Adagio	VARIETY	23	1.8	70	60
2012	TU_FS_2012	FS	1	CH761525	VARIETY	31	65	85	35
2012	TU_FS_2012	FS	1	Nogal	VARIETY	23	4	65	65
2012	TU_FS_2012	FS	1	Sokal	VARIETY	27	1.4	70	40
2012	TU_FS_2012	FS	1	UNG_136.16.7.4.7	IFA_TULLN	27	0	80	20
2012	TU_FS_2012	FS	1	Goncourt	VARIETY	27	49	65	100
2012	TU_FS_2012	FS	1	Bagou	VARIETY	27	67	65	100
2012	TU_FS_2012	FS	1	Royssac	VARIETY	27	137	60	100
2012	TU_FS_2012	FS	1	Apache	VARIETY	25	12.4	65	20
2012	TU_FS_2012	FS	1	Premio	VARIETY	25	5.8	65	100
2012	TU_FS_2012	FS	1	Pakito	VARIETY	25	17.2	70	85
2012	TU_FS_2012	FS	1	Manager	VARIETY	33	5.4	75	70
2012	TU_FS_2012	FS	1	L_1	DESPREZ	25	28.4	65	20
2012	TU_FS_2012	FS	1	Miroir	VARIETY	23	3.2	70	45
2012	TU_FS_2012	FS	1	Tulip	VARIETY	23	23.4	70	95
2012	TU_FS_2012	FS	1	Kalystar	VARIETY	29	9.6	70	30
2012	TU_FS_2012	FS	1	K9_21_AB.18	IFA_TULLN	25	2.8	70	15
2012	TU_FS_2012	FS	1	Oxebo	VARIETY	31	3.6	80	40
2012	TU_FS_2012	FS	1	Boregar	VARIETY	27	19.6	60	85
2012	TU_FS_2012	FS	1	BIO_110	IFA_TULLN	27	7	70	55
2012	TU_FS_2012	FS	1	Tobak	VARIETY	33	45.8	80	95
2012	TU_FS_2012	FS	1	Graindor	VARIETY	25	23.6	70	10
2012	TU_FS_2012	FS	1	Altigo	VARIETY	27	40	80	100
2012	TU_FS_2012	FS	1	Renan	VARIETY	27	1.4	75	60
2012	TU_FS_2012	FS	1	20818.1.2	IFA_TULLN	29	0	90	35
2013	TU_FG_2013	FG	2	Timber	VARIETY	44	510	70	60
2013	TU_FG_2013	FG	2	BIO_5019	IFA_TULLN	40	191	75	45
2013	TU_FG_2013	FG	2	20818.1.2	IFA_TULLN	38	38	95	15
2013	TU_FG_2013	FG	2	Capo	VARIETY	40	172	100	25
2013	TU_FG_2013	FG	2	Tobak	VARIETY	44	450	80	80
2013	TU_FG_2013	FG	2	Royssac	VARIETY	31	362	70	100
2013	TU_FG_2013	FG	2	Goncourt	VARIETY	38	480	70	95
2013	TU_FG_2013	FG	2	L_2	DESPREZ	38	320	75	45
2013	TU_FG_2013	FG	2	Boregar	VARIETY	38	410	70	50
2013	TU_FG_2013	FG	2	Musik	VARIETY	34	401	60	95
2013	TU_FG_2013	FG	2	Fluor	VARIETY	38	257	80	5
2013	TU_FG_2013	FG	2	Midas	VARIETY	40	161	85	40
2013	TU_FG_2013	FG	2	K9_21_AB.18	IFA_TULLN	31	110.4	75	15
2013	TU_FG_2013	FG	2	Alixan	VARIETY	38	285	70	35
2013	TU_FG_2013	FG	2	Cordiale	VARIETY	40	305	65	55
2013	TU_FG_2013	FG	2	Pakito	VARIETY	36	365	70	50
2013	TU_FG_2013	FG	2	Tulip	VARIETY	34	253	80	50
2013	TU_FG_2013	FG	2	Manager	VARIETY	44	175	80	50
2013	TU_FG_2013	FG	2	Graindor	VARIETY	34	233	70	25
2013	TU_FG_2013	FG	2	Isengrain	VARIETY	36	505	70	90
2013	TU_FG_2013	FG	2	Aligator	VARIETY	38	370	70	25
2013	TU_FG_2013	FG	2	A39.9.2.1	IFA_TULLN	42	67	85	20
2013	TU_FG_2013	FG	2	A40_22_1_2	IFA_TULLN	40	49	90	5
2013	TU_FG_2013	FG	2	Toisondor	VARIETY	40	410	65	100
2013	TU_FG_2013	FG	2	Arlequin	VARIETY	38	285	70	25
2013	TU_FG_2013	FG	2	Accroc	VARIETY	31	322	70	95
2013	TU_FG_2013	FG	2	UNG_136.16.7.4.7	IFA_TULLN	38	18.4	90	0
2013	TU_FG_2013	FG	2	Apache	VARIETY	38	230	70	0
2013	TU_FG_2013	FG	2	Kalystar	VARIETY	44	165	75	15
2013	TU_FG_2013	FG	2	Compil	VARIETY	38	250	70	55
2013	TU_FG_2013	FG	2	Azzerti	VARIETY	42	410	75	55
2013	TU_FG_2013	FG	2	RHT_216	IFA_TULLN	38	36.4	85	30
2013	TU_FG_2013	FG	2	Phare	VARIETY	44	380	75	80
2013	TU_FG_2013	FG	2	Azzuro	VARIETY	42	205	80	30
2013	TU_FG_2013	FG	2	Chevalier	VARIETY	44	305	80	30
2013	TU_FG_2013	FG	2	Sokal	VARIETY	38	215	70	10
2013	TU_FG_2013	FG	2	Miroir	VARIETY	31	260	70	50
2013	TU_FG_2013	FG	2	K11_16_AB.9	IFA_TULLN	42	183	90	25
2013	TU_FG_2013	FG	2	RHT_269	IFA_TULLN	38	145	80	25
2013	TU_FG_2013	FG	2	BIO_110	IFA_TULLN	38	214	75	45
2013	TU_FG_2013	FG	2	L_1	DESPREZ	31	200.4	65	45
2013	TU_FG_2013	FG	2	Mendel	VARIETY	42	490	65	95
2013	TU_FG_2013	FG	2	20812.2.2	IFA_TULLN	38	54	95	35
2013	TU_FG_2013	FG	2	20568.1.3	IFA_TULLN	38	48.4	90	10
2013	TU_FG_2013	FG	2	Bagou	VARIETY	38	390	70	70
2013	TU_FG_2013	FG	2	Nuage	VARIETY	40	241	70	15
2013	TU_FG_2013	FG	2	Barok	VARIETY	40	211	70	35
2013	TU_FG_2013	FG	2	Renan	VARIETY	38	114	80	20
2013	TU_FG_2013	FG	2	Ambello	VARIETY	34	194	70	90
2013	TU_FG_2013	FG	2	BIO_719	IFA_TULLN	31	162.4	70	65
2013	TU_FG_2013	FG	2	CH761525	VARIETY	40	213	85	25
2013	TU_FG_2013	FG	2	Mercato	VARIETY	36	300	60	85
2013	TU_FG_2013	FG	2	Oxebo	VARIETY	42	163	80	25
2013	TU_FG_2013	FG	2	Premio	VARIETY	38	405	75	80
2013	TU_FG_2013	FG	2	Adagio	VARIETY	34	228	70	30
2013	TU_FG_2013	FG	2	BIO_4036	IFA_TULLN	34	221	70	20
2013	TU_FG_2013	FG	2	Nogal	VARIETY	31	303	65	95
2013	TU_FG_2013	FG	2	Altigo	VARIETY	38	325	80	45
2013	TU_FG_2013	FG	2	Basmati	VARIETY	34	280.4	70	55
2013	TU_FG_2013	FG	2	Noblesko	VARIETY	44	360	75	70
2013	TU_FG_2013	FG	2	L_3	DESPREZ	38	223	80	65
2013	TU_FG_2013	FG	2	Bonifacio	VARIETY	36	325	70	60
2013	TU_FG_2013	FG	2	Allez_y	VARIETY	42	370	80	85
2013	TU_FG_2013	FG	2	L_4	DESPREZ	42	224	75	25
2013	TU_FG_2013	FG	2	Arkeos	VARIETY	38	380	70	95
2013	TU_FG_2013	FG	2	L_14	RAGT	34	280	65	55
2013	TU_FG_2013	FG	2	Cavalino	VARIETY	38	261	75	85
2013	TU_FG_2013	FG	2	Laurier	VARIETY	38	253	75	100
2013	TU_FG_2013	FG	2	Ascott	VARIETY	38	350	65	70
2013	TU_FG_2013	FG	2	Ronsard	VARIETY	36	260	65	35
2013	TU_FG_2013	FG	2	1351.5.10_P2	IFA_TULLN	44	103	90	20
2013	TU_FG_2013	FG	2	L_12	RAGT	36	321	65	40
2013	TU_FG_2013	FG	2	L_10	DESPREZ	38	370	65	90
2013	TU_FG_2013	FG	2	1305.6.5_P1	IFA_TULLN	44	24.8	100	30
2013	TU_FG_2013	FG	2	Arezzo	VARIETY	38	174	60	95
2013	TU_FG_2013	FG	2	Rubisko	VARIETY	38	207	65	50
2013	TU_FG_2013	FG	2	1304.4.8_P1	IFA_TULLN	38	130.4	85	0
2013	TU_FG_2013	FG	2	Calabro	VARIETY	38	570	60	100
2013	TU_FG_2013	FG	2	Bergamo	VARIETY	44	205	75	50
2013	TU_FG_2013	FG	2	L_8	DESPREZ	44	360	65	50
2013	TU_FG_2013	FG	2	L_9	DESPREZ	38	525	65	55
2013	TU_FG_2013	FG	2	Joker	VARIETY	44	265	80	95
2013	TU_FG_2013	FG	2	L_15	RAGT	31	360.4	65	90
2013	TU_FG_2013	FG	2	Karillon	VARIETY	40	430	70	45
2013	TU_FG_2013	FG	2	1309.2.4_P1	IFA_TULLN	46	52.4	100	35
2013	TU_FG_2013	FG	2	L_11	RAGT	38	580	65	70
2013	TU_FG_2013	FG	2	Sy_Moisson	VARIETY	38	240	70	100
2013	TU_FG_2013	FG	2	L_7	DESPREZ	42	241	70	45
2013	TU_FG_2013	FG	2	1354.2.2_P2	IFA_TULLN	38	80.4	80	85
2013	TU_FG_2013	FG	2	1314.3.11_P1	IFA_TULLN	42	103	80	0
2013	TU_FG_2013	FG	2	L_13	RAGT	44	310	75	65
2013	TU_FG_2013	FG	2	1308.2.5_P1	IFA_TULLN	38	145	85	15
2013	TU_FG_2013	FG	2	Fairplay	VARIETY	46	450	75	90
2013	TU_FG_2013	FG	2	L_6	DESPREZ	38	610	65	45
2013	TU_FG_2013	FG	2	Lyrik	VARIETY	38	305	65	15
2013	TU_FG_2013	FG	2	L_5	DESPREZ	34	401	65	65
2015	TU_FS_2015	FS	1	L_14	RAGT	28	6.8	70	NA
2015	TU_FS_2015	FS	1	Joker	VARIETY	34	6.4	85	NA
2015	TU_FS_2015	FS	1	K11_16_AB.9	IFA_TULLN	32	1	95	NA
2015	TU_FS_2015	FS	1	Midas	VARIETY	32	3.8	90	NA
2015	TU_FS_2015	FS	1	Arkeos	VARIETY	30	61.4	80	NA
2015	TU_FS_2015	FS	1	20812.2.2	IFA_TULLN	32	0.2	105	NA
2015	TU_FS_2015	FS	1	Cordiale	VARIETY	32	102	70	NA
2015	TU_FS_2015	FS	1	Kalystar	VARIETY	34	22.4	80	NA
2015	TU_FS_2015	FS	1	Manager	VARIETY	34	48.4	85	NA
2015	TU_FS_2015	FS	1	Pakito	VARIETY	30	9.8	75	NA
2015	TU_FS_2015	FS	1	L_2	DESPREZ	30	6.8	80	NA
2015	TU_FS_2015	FS	1	Timber	VARIETY	34	280	80	NA
2015	TU_FS_2015	FS	1	Sokal	VARIETY	30	0.6	75	NA
2015	TU_FS_2015	FS	1	Tulip	VARIETY	34	63	75	NA
2015	TU_FS_2015	FS	1	CH761525	VARIETY	30	1	95	NA
2015	TU_FS_2015	FS	1	BIO_5019	IFA_TULLN	34	52	75	NA
2015	TU_FS_2015	FS	1	Noblesko	VARIETY	34	34	80	NA
2015	TU_FS_2015	FS	1	Premio	VARIETY	32	16	70	NA
2015	TU_FS_2015	FS	1	Azzuro	VARIETY	32	2.8	80	NA
2015	TU_FS_2015	FS	1	L_8	DESPREZ	34	75	70	NA
2015	TU_FS_2015	FS	1	Capo	VARIETY	32	2.4	100	NA
2015	TU_FS_2015	FS	1	Mendel	VARIETY	32	93	70	NA
2015	TU_FS_2015	FS	1	A40_22_1_2	IFA_TULLN	32	0	90	NA
2015	TU_FS_2015	FS	1	BIO_110	IFA_TULLN	30	0.6	75	NA
2015	TU_FS_2015	FS	1	Barok	VARIETY	32	22.4	70	NA
2015	TU_FS_2015	FS	1	Accroc	VARIETY	28	32	70	NA
2015	TU_FS_2015	FS	1	20568.1.3	IFA_TULLN	30	0	95	NA
2015	TU_FS_2015	FS	1	Boregar	VARIETY	30	18.4	70	NA
2015	TU_FS_2015	FS	1	Aligator	VARIETY	30	14	75	NA
2015	TU_FS_2015	FS	1	Ascott	VARIETY	30	54	75	NA
2015	TU_FS_2015	FS	1	Mercato	VARIETY	28	12	70	NA
2015	TU_FS_2015	FS	1	Arezzo	VARIETY	30	6	75	NA
2015	TU_FS_2015	FS	1	Musik	VARIETY	30	0.6	80	NA
2015	TU_FS_2015	FS	1	1304.4.8_P1	IFA_TULLN	32	0	100	NA
2015	TU_FS_2015	FS	1	Azzerti	VARIETY	30	83.4	70	NA
2015	TU_FS_2015	FS	1	Phare	VARIETY	32	123	70	NA
2015	TU_FS_2015	FS	1	L_4	DESPREZ	32	21.4	85	NA
2015	TU_FS_2015	FS	1	20818.1.2	IFA_TULLN	32	0	105	NA
2015	TU_FS_2015	FS	1	Basmati	VARIETY	30	14.4	75	NA
2015	TU_FS_2015	FS	1	Fluor	VARIETY	30	0.6	80	NA
2015	TU_FS_2015	FS	1	Graindor	VARIETY	30	0	75	NA
2015	TU_FS_2015	FS	1	BIO_719	IFA_TULLN	30	0.2	75	NA
2015	TU_FS_2015	FS	1	Royssac	VARIETY	30	142	70	NA
2015	TU_FS_2015	FS	1	BIO_4036	IFA_TULLN	30	0	85	NA
2015	TU_FS_2015	FS	1	Allez_y	VARIETY	32	46.8	80	NA
2015	TU_FS_2015	FS	1	Fairplay	VARIETY	34	73	80	NA
2015	TU_FS_2015	FS	1	Alixan	VARIETY	30	24	75	NA
2015	TU_FS_2015	FS	1	RHT_269	IFA_TULLN	30	0	90	NA
2015	TU_FS_2015	FS	1	K9_21_AB.18	IFA_TULLN	30	1	75	NA
2015	TU_FS_2015	FS	1	Laurier	VARIETY	30	24	75	NA
2015	TU_FS_2015	FS	1	Chevalier	VARIETY	34	12.4	85	NA
2015	TU_FS_2015	FS	1	L_10	DESPREZ	30	27.8	70	NA
2015	TU_FS_2015	FS	1	L_1	DESPREZ	30	4	75	NA
2015	TU_FS_2015	FS	1	Isengrain	VARIETY	30	27.4	80	NA
2015	TU_FS_2015	FS	1	1305.6.5_P1	IFA_TULLN	34	0.2	105	NA
2015	TU_FS_2015	FS	1	Sy_Moisson	VARIETY	30	0	75	NA
2015	TU_FS_2015	FS	1	Ronsard	VARIETY	30	2.4	65	NA
2015	TU_FS_2015	FS	1	Tobak	VARIETY	34	44.8	85	NA
2015	TU_FS_2015	FS	1	L_11	RAGT	30	40.4	65	NA
2015	TU_FS_2015	FS	1	Adagio	VARIETY	28	1	75	NA
2015	TU_FS_2015	FS	1	Arlequin	VARIETY	30	26.4	75	NA
2015	TU_FS_2015	FS	1	1309.2.4_P1	IFA_TULLN	36	0	105	NA
2015	TU_FS_2015	FS	1	Karillon	VARIETY	32	93	75	NA
2015	TU_FS_2015	FS	1	Toisondor	VARIETY	32	290	70	NA
2015	TU_FS_2015	FS	1	Rubisko	VARIETY	30	12.4	70	NA
2015	TU_FS_2015	FS	1	L_15	RAGT	28	6.4	70	NA
2015	TU_FS_2015	FS	1	Bonifacio	VARIETY	30	6.4	75	NA
2015	TU_FS_2015	FS	1	A39.9.2.1	IFA_TULLN	36	0	85	NA
2015	TU_FS_2015	FS	1	Bagou	VARIETY	32	91.2	70	NA
2015	TU_FS_2015	FS	1	Goncourt	VARIETY	32	30.4	70	NA
2015	TU_FS_2015	FS	1	Compil	VARIETY	30	60	70	NA
2015	TU_FS_2015	FS	1	Nuage	VARIETY	32	44.4	80	NA
2015	TU_FS_2015	FS	1	L_7	DESPREZ	34	38.4	80	NA
2015	TU_FS_2015	FS	1	L_6	DESPREZ	28	33.2	70	NA
2015	TU_FS_2015	FS	1	1314.3.11_P1	IFA_TULLN	34	2.8	90	NA
2015	TU_FS_2015	FS	1	L_9	DESPREZ	30	10.4	75	NA
2015	TU_FS_2015	FS	1	Ambello	VARIETY	30	2.4	75	NA
2015	TU_FS_2015	FS	1	L_3	DESPREZ	30	6	80	NA
2015	TU_FS_2015	FS	1	Cavalino	VARIETY	30	12.4	75	NA
2015	TU_FS_2015	FS	1	1308.2.5_P1	IFA_TULLN	32	0	95	NA
2015	TU_FS_2015	FS	1	Miroir	VARIETY	28	1.4	70	NA
2015	TU_FS_2015	FS	1	Altigo	VARIETY	30	31	80	NA
2015	TU_FS_2015	FS	1	L_13	RAGT	34	31.8	80	NA
2015	TU_FS_2015	FS	1	1354.2.2_P2	IFA_TULLN	32	0.6	95	NA
2015	TU_FS_2015	FS	1	Bergamo	VARIETY	34	36.4	85	NA
2015	TU_FS_2015	FS	1	L_12	RAGT	30	48.4	75	NA
2015	TU_FS_2015	FS	1	Apache	VARIETY	30	2.8	75	NA
2015	TU_FS_2015	FS	1	Oxebo	VARIETY	34	6.4	85	NA
2015	TU_FS_2015	FS	1	Renan	VARIETY	32	16.4	80	NA
2015	TU_FS_2015	FS	1	Lyrik	VARIETY	32	72.4	80	NA
2015	TU_FS_2015	FS	1	1351.5.10_P2	IFA_TULLN	34	0.6	100	NA
2015	TU_FS_2015	FS	1	Calabro	VARIETY	30	41	70	NA
2015	TU_FS_2015	FS	1	Nogal	VARIETY	28	10.8	75	NA
2015	TU_FS_2015	FS	1	L_5	DESPREZ	30	0.6	80	NA
2015	TU_FS_2015	FS	1	UNG_136.16.7.4.7	IFA_TULLN	32	0.6	105	NA
2015	TU_FS_2015	FS	1	RHT_216	IFA_TULLN	32	0	90	NA
2014	TU_FC_2014	FC	2	Toisondor	VARIETY	28	940	70	90
2014	TU_FC_2014	FC	2	L_11	RAGT	26	665	70	85
2014	TU_FC_2014	FC	2	L_5	DESPREZ	24	160.8	75	50
2014	TU_FC_2014	FC	2	Calabro	VARIETY	22	268	75	100
2014	TU_FC_2014	FC	2	L_12	RAGT	24	471	75	75
2014	TU_FC_2014	FC	2	Cordiale	VARIETY	26	280	75	80
2014	TU_FC_2014	FC	2	Premio	VARIETY	24	297	75	95
2014	TU_FC_2014	FC	2	L_6	DESPREZ	22	133.4	75	70
2014	TU_FC_2014	FC	2	Ronsard	VARIETY	24	222	75	70
2014	TU_FC_2014	FC	2	Adagio	VARIETY	24	94	75	5
2014	TU_FC_2014	FC	2	Musik	VARIETY	26	421	75	85
2014	TU_FC_2014	FC	2	Compil	VARIETY	26	490	75	80
2014	TU_FC_2014	FC	2	L_14	RAGT	24	180.4	75	55
2014	TU_FC_2014	FC	2	Rubisko	VARIETY	26	148	75	95
2014	TU_FC_2014	FC	2	Apache	VARIETY	24	60.8	75	10
2014	TU_FC_2014	FC	2	Boregar	VARIETY	26	361	75	60
2014	TU_FC_2014	FC	2	L_8	DESPREZ	28	49.4	75	70
2014	TU_FC_2014	FC	2	Miroir	VARIETY	24	28.4	75	30
2014	TU_FC_2014	FC	2	Barok	VARIETY	26	92.4	75	35
2014	TU_FC_2014	FC	2	Aligator	VARIETY	24	112.4	75	40
2014	TU_FC_2014	FC	2	L_9	DESPREZ	22	272	80	55
2014	TU_FC_2014	FC	2	Phare	VARIETY	26	481	80	100
2014	TU_FC_2014	FC	2	Bagou	VARIETY	26	451	80	95
2014	TU_FC_2014	FC	2	L_1	DESPREZ	24	214	80	20
2014	TU_FC_2014	FC	2	Sokal	VARIETY	26	78	80	5
2014	TU_FC_2014	FC	2	Laurier	VARIETY	24	631	80	100
2014	TU_FC_2014	FC	2	Kalystar	VARIETY	28	104	80	25
2014	TU_FC_2014	FC	2	Ambello	VARIETY	24	53.4	80	70
2014	TU_FC_2014	FC	2	Mendel	VARIETY	26	321	80	100
2014	TU_FC_2014	FC	2	Mercato	VARIETY	24	277	80	85
2014	TU_FC_2014	FC	2	Pakito	VARIETY	26	221	80	75
2014	TU_FC_2014	FC	2	Nogal	VARIETY	22	58	80	40
2014	TU_FC_2014	FC	2	Ascott	VARIETY	24	312	80	100
2014	TU_FC_2014	FC	2	L_3	DESPREZ	24	75.8	80	80
2014	TU_FC_2014	FC	2	Lyrik	VARIETY	26	185	80	80
2014	TU_FC_2014	FC	2	Bonifacio	VARIETY	24	161.4	80	35
2014	TU_FC_2014	FC	2	Basmati	VARIETY	26	231	80	50
2014	TU_FC_2014	FC	2	L_10	DESPREZ	26	265	80	95
2014	TU_FC_2014	FC	2	Accroc	VARIETY	22	261.8	80	100
2014	TU_FC_2014	FC	2	Royssac	VARIETY	26	600	80	100
2014	TU_FC_2014	FC	2	Alixan	VARIETY	26	181	80	60
2014	TU_FC_2014	FC	2	Timber	VARIETY	28	360	80	100
2014	TU_FC_2014	FC	2	Karillon	VARIETY	28	121	80	60
2014	TU_FC_2014	FC	2	Noblesko	VARIETY	32	269	80	95
2014	TU_FC_2014	FC	2	Arkeos	VARIETY	24	264	80	95
2014	TU_FC_2014	FC	2	Nuage	VARIETY	28	172	80	50
2014	TU_FC_2014	FC	2	L_15	RAGT	22	289	85	60
2014	TU_FC_2014	FC	2	Fairplay	VARIETY	34	288	85	95
2014	TU_FC_2014	FC	2	Arlequin	VARIETY	24	324	85	5
2014	TU_FC_2014	FC	2	L_7	DESPREZ	28	227	85	25
2014	TU_FC_2014	FC	2	Altigo	VARIETY	24	483	85	65
2014	TU_FC_2014	FC	2	BIO_110	IFA_TULLN	22	66	85	30
2014	TU_FC_2014	FC	2	Bergamo	VARIETY	28	66	85	50
2014	TU_FC_2014	FC	2	Isengrain	VARIETY	24	546	85	80
2014	TU_FC_2014	FC	2	BIO_5019	IFA_TULLN	28	193	85	80
2014	TU_FC_2014	FC	2	Arezzo	VARIETY	24	352	85	100
2014	TU_FC_2014	FC	2	Azzerti	VARIETY	28	261.4	85	85
2014	TU_FC_2014	FC	2	Cavalino	VARIETY	26	290	85	70
2014	TU_FC_2014	FC	2	L_4	DESPREZ	28	109.8	85	55
2014	TU_FC_2014	FC	2	Sy_Moisson	VARIETY	26	70	85	25
2014	TU_FC_2014	FC	2	BIO_719	IFA_TULLN	26	40	85	5
2014	TU_FC_2014	FC	2	RHT_216	IFA_TULLN	26	1.4	85	55
2014	TU_FC_2014	FC	2	K9_21_AB.18	IFA_TULLN	24	10.8	85	5
2014	TU_FC_2014	FC	2	Graindor	VARIETY	24	14.8	85	0
2014	TU_FC_2014	FC	2	Tobak	VARIETY	32	190	85	100
2014	TU_FC_2014	FC	2	BIO_4036	IFA_TULLN	22	26	90	20
2014	TU_FC_2014	FC	2	Joker	VARIETY	28	36.4	90	95
2014	TU_FC_2014	FC	2	Goncourt	VARIETY	26	565	90	100
2014	TU_FC_2014	FC	2	Oxebo	VARIETY	28	73	90	75
2014	TU_FC_2014	FC	2	Azzuro	VARIETY	26	28.8	90	10
2014	TU_FC_2014	FC	2	L_13	RAGT	30	171	90	70
2014	TU_FC_2014	FC	2	L_2	DESPREZ	26	298.4	90	40
2014	TU_FC_2014	FC	2	Fluor	VARIETY	26	52.4	90	0
2014	TU_FC_2014	FC	2	Tulip	VARIETY	24	126.8	90	70
2014	TU_FC_2014	FC	2	1354.2.2_P2	IFA_TULLN	26	0.2	90	80
2014	TU_FC_2014	FC	2	Chevalier	VARIETY	30	50	95	80
2014	TU_FC_2014	FC	2	Allez_y	VARIETY	28	690	95	95
2014	TU_FC_2014	FC	2	1314.3.11_P1	IFA_TULLN	28	1.2	95	25
2014	TU_FC_2014	FC	2	1308.2.5_P1	IFA_TULLN	28	2.8	95	10
2014	TU_FC_2014	FC	2	Manager	VARIETY	32	67	95	90
2014	TU_FC_2014	FC	2	Renan	VARIETY	26	22.4	95	15
2014	TU_FC_2014	FC	2	A39.9.2.1	IFA_TULLN	30	1.4	95	10
2014	TU_FC_2014	FC	2	Midas	VARIETY	26	6.4	95	35
2014	TU_FC_2014	FC	2	20568.1.3	IFA_TULLN	26	1	100	0
2014	TU_FC_2014	FC	2	CH761525	VARIETY	28	232	100	30
2014	TU_FC_2014	FC	2	RHT_269	IFA_TULLN	28	2.8	100	45
2014	TU_FC_2014	FC	2	1304.4.8_P1	IFA_TULLN	24	2.8	100	5
2014	TU_FC_2014	FC	2	1351.5.10_P2	IFA_TULLN	32	1.2	105	15
2014	TU_FC_2014	FC	2	20812.2.2	IFA_TULLN	26	1	105	35
2014	TU_FC_2014	FC	2	UNG_136.16.7.4.7	IFA_TULLN	26	0	105	5
2014	TU_FC_2014	FC	2	K11_16_AB.9	IFA_TULLN	28	4.4	105	20
2014	TU_FC_2014	FC	2	A40_22_1_2	IFA_TULLN	28	1	105	5
2014	TU_FC_2014	FC	2	1305.6.5_P1	IFA_TULLN	30	2	110	10
2014	TU_FC_2014	FC	2	Capo	VARIETY	26	54	110	40
2014	TU_FC_2014	FC	2	1309.2.4_P1	IFA_TULLN	32	2.2	110	15
2014	TU_FC_2014	FC	2	20818.1.2	IFA_TULLN	26	0.6	110	20
2015	TU_FC_2015	FC	2	20812.2.2	IFA_TULLN	34	1	100	50
2015	TU_FC_2015	FC	2	Bonifacio	VARIETY	30	92.4	75	35
2015	TU_FC_2015	FC	2	Arezzo	VARIETY	32	162	75	100
2015	TU_FC_2015	FC	2	L_12	RAGT	32	410	70	65
2015	TU_FC_2015	FC	2	K11_16_AB.9	IFA_TULLN	34	24.4	95	20
2015	TU_FC_2015	FC	2	Ambello	VARIETY	32	102	75	95
2015	TU_FC_2015	FC	2	Nuage	VARIETY	34	500	70	70
2015	TU_FC_2015	FC	2	L_7	DESPREZ	34	358	75	65
2015	TU_FC_2015	FC	2	Premio	VARIETY	32	356	70	80
2015	TU_FC_2015	FC	2	1314.3.11_P1	IFA_TULLN	36	35.4	85	45
2015	TU_FC_2015	FC	2	Bagou	VARIETY	34	490	75	100
2015	TU_FC_2015	FC	2	BIO_110	IFA_TULLN	34	75	80	20
2015	TU_FC_2015	FC	2	Royssac	VARIETY	30	810	70	95
2015	TU_FC_2015	FC	2	L_15	RAGT	30	270	70	85
2015	TU_FC_2015	FC	2	L_13	RAGT	36	281	80	90
2015	TU_FC_2015	FC	2	Compil	VARIETY	34	365	75	70
2015	TU_FC_2015	FC	2	Barok	VARIETY	34	131	70	30
2015	TU_FC_2015	FC	2	Azzuro	VARIETY	34	103	85	15
2015	TU_FC_2015	FC	2	Timber	VARIETY	34	560	80	95
2015	TU_FC_2015	FC	2	Fluor	VARIETY	34	151	85	15
2015	TU_FC_2015	FC	2	Phare	VARIETY	34	540	70	100
2015	TU_FC_2015	FC	2	1308.2.5_P1	IFA_TULLN	34	11.8	95	25
2015	TU_FC_2015	FC	2	Capo	VARIETY	34	112	100	30
2015	TU_FC_2015	FC	2	Renan	VARIETY	34	121	90	30
2015	TU_FC_2015	FC	2	1304.4.8_P1	IFA_TULLN	32	7.6	95	10
2015	TU_FC_2015	FC	2	Alixan	VARIETY	32	399	75	45
2015	TU_FC_2015	FC	2	Oxebo	VARIETY	34	111	85	45
2015	TU_FC_2015	FC	2	BIO_719	IFA_TULLN	30	24	70	50
2015	TU_FC_2015	FC	2	Kalystar	VARIETY	36	238	80	30
2015	TU_FC_2015	FC	2	Sokal	VARIETY	34	89	75	5
2015	TU_FC_2015	FC	2	L_14	RAGT	30	128.4	70	40
2015	TU_FC_2015	FC	2	20818.1.2	IFA_TULLN	34	0	100	35
2015	TU_FC_2015	FC	2	Midas	VARIETY	34	71	95	20
2015	TU_FC_2015	FC	2	Karillon	VARIETY	34	340	80	90
2015	TU_FC_2015	FC	2	Ronsard	VARIETY	32	176	70	45
2015	TU_FC_2015	FC	2	A40_22_1_2	IFA_TULLN	34	6.2	95	0
2015	TU_FC_2015	FC	2	L_5	DESPREZ	32	134	75	80
2015	TU_FC_2015	FC	2	L_9	DESPREZ	32	188	80	70
2015	TU_FC_2015	FC	2	Altigo	VARIETY	34	428	80	80
2015	TU_FC_2015	FC	2	Adagio	VARIETY	30	52.4	75	0
2015	TU_FC_2015	FC	2	Bergamo	VARIETY	36	221	75	45
2015	TU_FC_2015	FC	2	Boregar	VARIETY	32	478	70	70
2015	TU_FC_2015	FC	2	Noblesko	VARIETY	36	330	80	95
2015	TU_FC_2015	FC	2	BIO_5019	IFA_TULLN	36	298	80	80
2015	TU_FC_2015	FC	2	Calabro	VARIETY	32	405	70	100
2015	TU_FC_2015	FC	2	RHT_269	IFA_TULLN	34	6.8	85	40
2015	TU_FC_2015	FC	2	Arlequin	VARIETY	32	213	75	10
2015	TU_FC_2015	FC	2	1351.5.10_P2	IFA_TULLN	36	2.4	75	35
2015	TU_FC_2015	FC	2	K9_21_AB.18	IFA_TULLN	32	50	80	15
2015	TU_FC_2015	FC	2	Toisondor	VARIETY	34	970	70	100
2015	TU_FC_2015	FC	2	A39.9.2.1	IFA_TULLN	36	37.4	90	30
2015	TU_FC_2015	FC	2	Rubisko	VARIETY	32	193	70	85
2015	TU_FC_2015	FC	2	L_1	DESPREZ	30	133	70	20
2015	TU_FC_2015	FC	2	Lyrik	VARIETY	34	150	80	75
2015	TU_FC_2015	FC	2	CH761525	VARIETY	34	201	90	45
2015	TU_FC_2015	FC	2	1309.2.4_P1	IFA_TULLN	38	10.8	110	35
2015	TU_FC_2015	FC	2	Ascott	VARIETY	32	573	75	85
2015	TU_FC_2015	FC	2	L_4	DESPREZ	34	230	80	50
2015	TU_FC_2015	FC	2	Musik	VARIETY	32	346	70	100
2015	TU_FC_2015	FC	2	L_2	DESPREZ	34	108	80	80
2015	TU_FC_2015	FC	2	Accroc	VARIETY	30	232	70	90
2015	TU_FC_2015	FC	2	L_10	DESPREZ	30	193	75	85
2015	TU_FC_2015	FC	2	Chevalier	VARIETY	36	368	80	70
2015	TU_FC_2015	FC	2	1305.6.5_P1	IFA_TULLN	36	2	100	10
2015	TU_FC_2015	FC	2	L_8	DESPREZ	36	500	70	85
2015	TU_FC_2015	FC	2	Pakito	VARIETY	32	182	70	85
2015	TU_FC_2015	FC	2	L_3	DESPREZ	32	102	80	85
2015	TU_FC_2015	FC	2	Tobak	VARIETY	36	208	80	100
2015	TU_FC_2015	FC	2	BIO_4036	IFA_TULLN	30	25	80	20
2015	TU_FC_2015	FC	2	Aligator	VARIETY	32	156	70	45
2015	TU_FC_2015	FC	2	Fairplay	VARIETY	36	480	80	95
2015	TU_FC_2015	FC	2	Cavalino	VARIETY	32	128	70	100
2015	TU_FC_2015	FC	2	Nogal	VARIETY	30	103.4	70	55
2015	TU_FC_2015	FC	2	UNG_136.16.7.4.7	IFA_TULLN	34	0.6	100	15
2015	TU_FC_2015	FC	2	Azzerti	VARIETY	36	430	80	100
2015	TU_FC_2015	FC	2	Apache	VARIETY	32	144	75	0
2015	TU_FC_2015	FC	2	Sy_Moisson	VARIETY	32	94	80	45
2015	TU_FC_2015	FC	2	Arkeos	VARIETY	32	515	70	100
2015	TU_FC_2015	FC	2	20568.1.3	IFA_TULLN	34	1	100	5
2015	TU_FC_2015	FC	2	Allez_y	VARIETY	34	410	80	85
2015	TU_FC_2015	FC	2	Mercato	VARIETY	32	108	80	85
2015	TU_FC_2015	FC	2	Graindor	VARIETY	32	52	80	10
2015	TU_FC_2015	FC	2	Mendel	VARIETY	34	550	75	100
2015	TU_FC_2015	FC	2	1354.2.2_P2	IFA_TULLN	34	6	80	90
2015	TU_FC_2015	FC	2	Manager	VARIETY	36	218	85	85
2015	TU_FC_2015	FC	2	L_11	RAGT	32	660	60	75
2015	TU_FC_2015	FC	2	RHT_216	IFA_TULLN	32	1.4	85	45
2015	TU_FC_2015	FC	2	Goncourt	VARIETY	32	480	75	100
2015	TU_FC_2015	FC	2	Miroir	VARIETY	30	52.4	75	5
2015	TU_FC_2015	FC	2	Joker	VARIETY	36	107	85	95
2015	TU_FC_2015	FC	2	Tulip	VARIETY	32	170	80	65
2015	TU_FC_2015	FC	2	Isengrain	VARIETY	32	166	75	100
2015	TU_FC_2015	FC	2	Cordiale	VARIETY	34	590	70	85
2015	TU_FC_2015	FC	2	Basmati	VARIETY	32	196	75	70
2015	TU_FC_2015	FC	2	L_6	DESPREZ	30	485	70	65
2015	TU_FC_2015	FC	2	Laurier	VARIETY	34	257	75	100
2011	TU_FS_2011	FS	2	Barok	VARIETY	25	56.8	75	25
2011	TU_FS_2011	FS	2	Apache	VARIETY	23	26.8	75	25
2011	TU_FS_2011	FS	2	Timber	VARIETY	29	245	75	75
2011	TU_FS_2011	FS	2	20568.1.3	IFA_TULLN	23	1.4	95	25
2011	TU_FS_2011	FS	2	Azzuro	VARIETY	27	21.4	80	25
2011	TU_FS_2011	FS	2	Toisondor	VARIETY	25	138	65	62.5
2011	TU_FS_2011	FS	2	A39.9.2.1	IFA_TULLN	31	1.8	85	12.5
2011	TU_FS_2011	FS	2	Aligator	VARIETY	23	12.8	75	25
2011	TU_FS_2011	FS	2	Bagou	VARIETY	23	136	75	100
2011	TU_FS_2011	FS	2	Renan	VARIETY	27	20.6	85	37.5
2011	TU_FS_2011	FS	2	Isengrain	VARIETY	25	64.4	75	50
2011	TU_FS_2011	FS	2	Midas	VARIETY	25	14.8	90	25
2011	TU_FS_2011	FS	2	Arlequin	VARIETY	23	17.2	75	37.5
2011	TU_FS_2011	FS	2	20812.2.2	IFA_TULLN	27	0.2	95	12.5
2011	TU_FS_2011	FS	2	Mendel	VARIETY	23	74.4	70	100
2011	TU_FS_2011	FS	2	Capo	VARIETY	27	11.2	105	12.5
2011	TU_FS_2011	FS	2	Altigo	VARIETY	23	30.8	80	75
2011	TU_FS_2011	FS	2	Nuage	VARIETY	27	61	70	37.5
2011	TU_FS_2011	FS	2	Boregar	VARIETY	23	16.4	70	62.5
2011	TU_FS_2011	FS	2	Mercato	VARIETY	23	3.2	75	62.5
2011	TU_FS_2011	FS	2	Premio	VARIETY	23	1.4	70	50
2011	TU_FS_2011	FS	2	20818.1.2	IFA_TULLN	27	0.2	95	25
2011	TU_FS_2011	FS	2	Royssac	VARIETY	23	105.8	70	87.5
2011	TU_FS_2011	FS	2	Chevalier	VARIETY	27	54.2	80	50
2011	TU_FS_2011	FS	2	Alixan	VARIETY	25	48.4	75	25
2011	TU_FS_2011	FS	2	Cordiale	VARIETY	27	111.8	70	37.5
2012	TU_FS_2012	FS	2	K9_21_AB.18	IFA_TULLN	23	1	65	10
2012	TU_FS_2012	FS	2	20818.1.2	IFA_TULLN	27	0	85	50
2012	TU_FS_2012	FS	2	Chevalier	VARIETY	31	5.2	70	85
2012	TU_FS_2012	FS	2	Alixan	VARIETY	27	2	80	40
2012	TU_FS_2012	FS	2	Barok	VARIETY	27	3.8	60	85
2012	TU_FS_2012	FS	2	Compil	VARIETY	27	6	65	100
2012	TU_FS_2012	FS	2	L_1	DESPREZ	25	1.6	60	30
2012	TU_FS_2012	FS	2	Nogal	VARIETY	23	2.4	55	50
2012	TU_FS_2012	FS	2	A39.9.2.1	IFA_TULLN	31	0	80	10
2012	TU_FS_2012	FS	2	Accroc	VARIETY	23	3.2	60	100
2012	TU_FS_2012	FS	2	A40_22_1_2	IFA_TULLN	29	0	85	5
2012	TU_FS_2012	FS	2	Azzuro	VARIETY	27	0.2	75	60
2012	TU_FS_2012	FS	2	Premio	VARIETY	25	3.8	60	100
2012	TU_FS_2012	FS	2	Goncourt	VARIETY	27	56	65	100
2012	TU_FS_2012	FS	2	BIO_719	IFA_TULLN	23	2.4	60	75
2012	TU_FS_2012	FS	2	BIO_5019	IFA_TULLN	29	1.4	70	80
2012	TU_FS_2012	FS	2	Apache	VARIETY	25	1.4	65	10
2012	TU_FS_2012	FS	2	Mercato	VARIETY	25	83.2	55	85
2012	TU_FS_2012	FS	2	Toisondor	VARIETY	29	171	60	100
2012	TU_FS_2012	FS	2	K11_16_AB.9	IFA_TULLN	31	0	80	70
2012	TU_FS_2012	FS	2	Mendel	VARIETY	29	65	60	100
2012	TU_FS_2012	FS	2	CH761525	VARIETY	31	22	85	20
2012	TU_FS_2012	FS	2	Oxebo	VARIETY	31	22.6	70	55
2012	TU_FS_2012	FS	2	20568.1.3	IFA_TULLN	25	0	75	0
2012	TU_FS_2012	FS	2	Musik	VARIETY	25	80.4	55	100
2012	TU_FS_2012	FS	2	Pakito	VARIETY	25	3.2	65	95
2012	TU_FS_2012	FS	2	Kalystar	VARIETY	29	3.8	70	30
2012	TU_FS_2012	FS	2	Royssac	VARIETY	25	193.4	60	75
2012	TU_FS_2012	FS	2	Bagou	VARIETY	25	75.2	65	100
2012	TU_FS_2012	FS	2	Graindor	VARIETY	23	1.4	70	35
2012	TU_FS_2012	FS	2	Nuage	VARIETY	27	19.4	70	75
2012	TU_FS_2012	FS	2	Tulip	VARIETY	23	15.4	70	85
2012	TU_FS_2012	FS	2	Cordiale	VARIETY	29	25.8	60	90
2012	TU_FS_2012	FS	2	Aligator	VARIETY	29	14	85	45
2012	TU_FS_2012	FS	2	Altigo	VARIETY	25	42.4	70	95
2012	TU_FS_2012	FS	2	RHT_269	IFA_TULLN	29	0.6	70	50
2012	TU_FS_2012	FS	2	Adagio	VARIETY	23	3.8	65	75
2012	TU_FS_2012	FS	2	Renan	VARIETY	25	0.6	80	55
2012	TU_FS_2012	FS	2	UNG_136.16.7.4.7	IFA_TULLN	25	0	85	10
2012	TU_FS_2012	FS	2	Fluor	VARIETY	25	0.2	75	45
2012	TU_FS_2012	FS	2	Azzerti	VARIETY	31	58	70	85
2012	TU_FS_2012	FS	2	Midas	VARIETY	27	0.6	75	65
2012	TU_FS_2012	FS	2	Ambello	VARIETY	25	3.6	65	100
2012	TU_FS_2012	FS	2	Isengrain	VARIETY	27	15.4	60	75
2012	TU_FS_2012	FS	2	Arlequin	VARIETY	25	13.4	65	45
2012	TU_FS_2012	FS	2	Timber	VARIETY	31	150	65	100
2012	TU_FS_2012	FS	2	Manager	VARIETY	31	1.4	75	75
2012	TU_FS_2012	FS	2	Boregar	VARIETY	27	62	65	75
2012	TU_FS_2012	FS	2	Capo	VARIETY	25	1.4	70	95
2012	TU_FS_2012	FS	2	Miroir	VARIETY	23	5.4	65	50
2012	TU_FS_2012	FS	2	L_2	DESPREZ	27	38	70	75
2012	TU_FS_2012	FS	2	Phare	VARIETY	31	134	70	100
2012	TU_FS_2012	FS	2	BIO_4036	IFA_TULLN	23	18.4	75	20
2012	TU_FS_2012	FS	2	RHT_216	IFA_TULLN	27	1.4	75	70
2012	TU_FS_2012	FS	2	20812.2.2	IFA_TULLN	27	0	90	60
2012	TU_FS_2012	FS	2	BIO_110	IFA_TULLN	25	2.4	70	70
2012	TU_FS_2012	FS	2	Sokal	VARIETY	25	1	70	35
2012	TU_FS_2012	FS	2	Tobak	VARIETY	33	47	80	100
2013	TU_FS_2013	FS	2	Renan	VARIETY	38	62	75	40
2013	TU_FS_2013	FS	2	Kalystar	VARIETY	42	113	70	30
2013	TU_FS_2013	FS	2	K11_16_AB.9	IFA_TULLN	40	72	85	5
2013	TU_FS_2013	FS	2	Nogal	VARIETY	28	71.4	70	75
2013	TU_FS_2013	FS	2	Adagio	VARIETY	34	109.4	65	50
2013	TU_FS_2013	FS	2	Midas	VARIETY	40	56	80	45
2013	TU_FS_2013	FS	2	Mercato	VARIETY	34	153	65	95
2013	TU_FS_2013	FS	2	Cordiale	VARIETY	40	160	70	95
2013	TU_FS_2013	FS	2	Musik	VARIETY	38	281	60	100
2013	TU_FS_2013	FS	2	Apache	VARIETY	36	153	70	0
2013	TU_FS_2013	FS	2	Barok	VARIETY	40	161	70	15
2013	TU_FS_2013	FS	2	Oxebo	VARIETY	42	65.4	75	15
2013	TU_FS_2013	FS	2	K9_21_AB.18	IFA_TULLN	36	140.4	75	10
2013	TU_FS_2013	FS	2	BIO_5019	IFA_TULLN	40	60	75	60
2013	TU_FS_2013	FS	2	Ambello	VARIETY	34	84.4	70	100
2013	TU_FS_2013	FS	2	Alixan	VARIETY	40	120	70	85
2013	TU_FS_2013	FS	2	Compil	VARIETY	38	123	65	90
2013	TU_FS_2013	FS	2	Accroc	VARIETY	31	160.4	65	85
2013	TU_FS_2013	FS	2	A40_22_1_2	IFA_TULLN	40	7	85	10
2013	TU_FS_2013	FS	2	Tobak	VARIETY	44	129	75	90
2013	TU_FS_2013	FS	2	RHT_269	IFA_TULLN	38	32.4	80	35
2013	TU_FS_2013	FS	2	Chevalier	VARIETY	44	127	80	95
2013	TU_FS_2013	FS	2	Nuage	VARIETY	40	113	75	55
2013	TU_FS_2013	FS	2	BIO_110	IFA_TULLN	38	54.4	75	55
2013	TU_FS_2013	FS	2	Phare	VARIETY	42	185	70	95
2013	TU_FS_2013	FS	2	BIO_719	IFA_TULLN	36	130.4	70	75
2013	TU_FS_2013	FS	2	Pakito	VARIETY	36	153	70	60
2013	TU_FS_2013	FS	2	20818.1.2	IFA_TULLN	38	14.4	90	65
2013	TU_FS_2013	FS	2	Arlequin	VARIETY	40	130	65	55
2013	TU_FS_2013	FS	2	Boregar	VARIETY	40	103	70	80
2013	TU_FS_2013	FS	2	20812.2.2	IFA_TULLN	38	6.4	90	55
2013	TU_FS_2013	FS	2	L_2	DESPREZ	40	188	80	55
2013	TU_FS_2013	FS	2	Bagou	VARIETY	38	221	65	75
2013	TU_FS_2013	FS	2	Azzerti	VARIETY	42	161	70	95
2013	TU_FS_2013	FS	2	BIO_4036	IFA_TULLN	34	88	70	30
2013	TU_FS_2013	FS	2	A39.9.2.1	IFA_TULLN	46	90.4	80	15
2013	TU_FS_2013	FS	2	Goncourt	VARIETY	38	241	65	100
2013	TU_FS_2013	FS	2	Timber	VARIETY	44	195	70	90
2013	TU_FS_2013	FS	2	UNG_136.16.7.4.7	IFA_TULLN	38	1	90	5
2013	TU_FS_2013	FS	2	Tulip	VARIETY	38	143	75	45
2013	TU_FS_2013	FS	2	Mendel	VARIETY	40	159	65	100
2013	TU_FS_2013	FS	2	Premio	VARIETY	38	174	70	90
2013	TU_FS_2013	FS	2	Miroir	VARIETY	31	64.4	70	25
2013	TU_FS_2013	FS	2	Toisondor	VARIETY	40	201	60	100
2013	TU_FS_2013	FS	2	Isengrain	VARIETY	38	225	70	100
2013	TU_FS_2013	FS	2	Azzuro	VARIETY	44	189	80	50
2013	TU_FS_2013	FS	2	Royssac	VARIETY	38	301	65	80
2013	TU_FS_2013	FS	2	CH761525	VARIETY	40	153	90	50
2013	TU_FS_2013	FS	2	RHT_216	IFA_TULLN	38	30.4	80	45
2013	TU_FS_2013	FS	2	Aligator	VARIETY	40	105	70	60
2013	TU_FS_2013	FS	2	20568.1.3	IFA_TULLN	38	39.8	90	0
2013	TU_FS_2013	FS	2	L_1	DESPREZ	31	64.4	65	30
2013	TU_FS_2013	FS	2	Fluor	VARIETY	38	141.4	75	45
2013	TU_FS_2013	FS	2	Sokal	VARIETY	38	85.4	70	0
2013	TU_FS_2013	FS	2	Altigo	VARIETY	38	249	80	95
2013	TU_FS_2013	FS	2	Capo	VARIETY	40	20	95	20
2013	TU_FS_2013	FS	2	Manager	VARIETY	44	103	80	90
2013	TU_FS_2013	FS	2	Graindor	VARIETY	34	122.4	70	10
2013	TU_FS_2013	FS	2	L_12	RAGT	38	193	65	45
2013	TU_FS_2013	FS	2	1304.4.8_P1	IFA_TULLN	38	54.4	85	0
2013	TU_FS_2013	FS	2	Bonifacio	VARIETY	36	222	70	55
2013	TU_FS_2013	FS	2	Calabro	VARIETY	38	281	65	100
2013	TU_FS_2013	FS	2	1314.3.11_P1	IFA_TULLN	44	95.4	85	35
2013	TU_FS_2013	FS	2	Noblesko	VARIETY	42	104	75	100
2013	TU_FS_2013	FS	2	Fairplay	VARIETY	46	113	75	100
2013	TU_FS_2013	FS	2	1351.5.10_P2	IFA_TULLN	44	23.8	90	25
2013	TU_FS_2013	FS	2	Bergamo	VARIETY	44	111	75	70
2013	TU_FS_2013	FS	2	L_13	RAGT	42	118.4	75	100
2013	TU_FS_2013	FS	2	Ascott	VARIETY	38	133	70	95
2013	TU_FS_2013	FS	2	L_8	DESPREZ	44	145	70	75
2013	TU_FS_2013	FS	2	Allez_y	VARIETY	40	181	80	100
2013	TU_FS_2013	FS	2	Rubisko	VARIETY	38	102	65	55
2013	TU_FS_2013	FS	2	L_7	DESPREZ	44	123	75	60
2013	TU_FS_2013	FS	2	L_4	DESPREZ	42	64	75	60
2013	TU_FS_2013	FS	2	L_10	DESPREZ	38	189	65	75
2013	TU_FS_2013	FS	2	Basmati	VARIETY	34	111	65	80
2013	TU_FS_2013	FS	2	Lyrik	VARIETY	40	119	70	90
2013	TU_FS_2013	FS	2	L_6	DESPREZ	34	98.4	60	65
2013	TU_FS_2013	FS	2	L_14	RAGT	34	122	65	70
2013	TU_FS_2013	FS	2	1305.6.5_P1	IFA_TULLN	40	6.4	90	35
2013	TU_FS_2013	FS	2	L_9	DESPREZ	38	142	65	70
2013	TU_FS_2013	FS	2	Cavalino	VARIETY	38	170.4	70	95
2013	TU_FS_2013	FS	2	1308.2.5_P1	IFA_TULLN	38	14	85	5
2013	TU_FS_2013	FS	2	1354.2.2_P2	IFA_TULLN	40	14.8	90	85
2013	TU_FS_2013	FS	2	L_11	RAGT	38	229	65	75
2013	TU_FS_2013	FS	2	L_3	DESPREZ	38	124	75	55
2013	TU_FS_2013	FS	2	1309.2.4_P1	IFA_TULLN	46	47	90	35
2013	TU_FS_2013	FS	2	Laurier	VARIETY	38	202	70	100
2013	TU_FS_2013	FS	2	Arkeos	VARIETY	36	164	70	45
2013	TU_FS_2013	FS	2	Ronsard	VARIETY	36	154	65	NA
2013	TU_FS_2013	FS	2	L_5	DESPREZ	36	193	70	75
2013	TU_FS_2013	FS	2	Arezzo	VARIETY	NA	NA	NA	NA
2013	TU_FS_2013	FS	2	L_15	RAGT	34	112.4	70	65
2013	TU_FS_2013	FS	2	Karillon	VARIETY	40	261	70	90
2013	TU_FS_2013	FS	2	Joker	VARIETY	44	101	80	80
2013	TU_FS_2013	FS	2	Sy_Moisson	VARIETY	38	81	70	85
2015	TU_FS_2015	FS	2	Alixan	VARIETY	32	52.4	75	NA
2015	TU_FS_2015	FS	2	BIO_4036	IFA_TULLN	30	0.6	90	NA
2015	TU_FS_2015	FS	2	20568.1.3	IFA_TULLN	32	0.6	100	NA
2015	TU_FS_2015	FS	2	Barok	VARIETY	34	46	70	NA
2015	TU_FS_2015	FS	2	L_12	RAGT	32	14.4	75	NA
2015	TU_FS_2015	FS	2	Manager	VARIETY	36	119	80	NA
2015	TU_FS_2015	FS	2	Graindor	VARIETY	32	1.4	80	NA
2015	TU_FS_2015	FS	2	BIO_719	IFA_TULLN	30	0.6	75	NA
2015	TU_FS_2015	FS	2	Capo	VARIETY	34	6.4	100	NA
2015	TU_FS_2015	FS	2	A39.9.2.1	IFA_TULLN	36	1.4	85	NA
2015	TU_FS_2015	FS	2	Tulip	VARIETY	30	0.6	80	NA
2015	TU_FS_2015	FS	2	Ascott	VARIETY	32	102.2	70	NA
2015	TU_FS_2015	FS	2	L_10	DESPREZ	32	53.4	75	NA
2015	TU_FS_2015	FS	2	L_1	DESPREZ	30	14.4	70	NA
2015	TU_FS_2015	FS	2	1305.6.5_P1	IFA_TULLN	36	1.4	100	NA
2015	TU_FS_2015	FS	2	Laurier	VARIETY	32	42.8	80	NA
2015	TU_FS_2015	FS	2	Phare	VARIETY	36	120	70	NA
2015	TU_FS_2015	FS	2	L_3	DESPREZ	32	6.4	80	NA
2015	TU_FS_2015	FS	2	Midas	VARIETY	34	1.4	90	NA
2015	TU_FS_2015	FS	2	Chevalier	VARIETY	36	83	80	NA
2015	TU_FS_2015	FS	2	Mercato	VARIETY	30	4.4	70	NA
2015	TU_FS_2015	FS	2	L_9	DESPREZ	32	34	70	NA
2015	TU_FS_2015	FS	2	1354.2.2_P2	IFA_TULLN	34	0	90	NA
2015	TU_FS_2015	FS	2	Rubisko	VARIETY	30	8	70	NA
2015	TU_FS_2015	FS	2	Pakito	VARIETY	32	12.8	70	NA
2015	TU_FS_2015	FS	2	UNG_136.16.7.4.7	IFA_TULLN	32	0	100	NA
2015	TU_FS_2015	FS	2	Renan	VARIETY	32	20.4	85	NA
2015	TU_FS_2015	FS	2	Adagio	VARIETY	30	12.8	70	NA
2015	TU_FS_2015	FS	2	Arezzo	VARIETY	32	3.2	75	NA
2015	TU_FS_2015	FS	2	Noblesko	VARIETY	36	38	80	NA
2015	TU_FS_2015	FS	2	L_13	RAGT	36	30.4	80	NA
2015	TU_FS_2015	FS	2	Premio	VARIETY	32	22.8	70	NA
2015	TU_FS_2015	FS	2	Arkeos	VARIETY	30	63	80	NA
2015	TU_FS_2015	FS	2	Altigo	VARIETY	32	34.4	80	NA
2015	TU_FS_2015	FS	2	K11_16_AB.9	IFA_TULLN	34	2.8	95	NA
2015	TU_FS_2015	FS	2	Allez_y	VARIETY	34	72	85	NA
2015	TU_FS_2015	FS	2	1314.3.11_P1	IFA_TULLN	34	3.2	85	NA
2015	TU_FS_2015	FS	2	L_7	DESPREZ	34	24.4	80	NA
2015	TU_FS_2015	FS	2	Kalystar	VARIETY	34	30.4	75	NA
2015	TU_FS_2015	FS	2	Azzerti	VARIETY	36	68	80	NA
2015	TU_FS_2015	FS	2	Joker	VARIETY	36	50	80	NA
2015	TU_FS_2015	FS	2	L_6	DESPREZ	30	4.2	65	NA
2015	TU_FS_2015	FS	2	Nogal	VARIETY	30	0.2	70	NA
2015	TU_FS_2015	FS	2	Oxebo	VARIETY	36	66	75	NA
2015	TU_FS_2015	FS	2	A40_22_1_2	IFA_TULLN	36	1	95	NA
2015	TU_FS_2015	FS	2	1304.4.8_P1	IFA_TULLN	32	0	95	NA
2015	TU_FS_2015	FS	2	Musik	VARIETY	32	62	65	NA
2015	TU_FS_2015	FS	2	Mendel	VARIETY	34	101	70	NA
2015	TU_FS_2015	FS	2	Toisondor	VARIETY	34	190	65	NA
2015	TU_FS_2015	FS	2	L_8	DESPREZ	34	88.4	80	NA
2015	TU_FS_2015	FS	2	Accroc	VARIETY	30	40	70	NA
2015	TU_FS_2015	FS	2	Royssac	VARIETY	30	75	70	NA
2015	TU_FS_2015	FS	2	L_11	RAGT	30	32.8	65	NA
2015	TU_FS_2015	FS	2	20812.2.2	IFA_TULLN	34	0	100	NA
2015	TU_FS_2015	FS	2	K9_21_AB.18	IFA_TULLN	30	2.4	80	NA
2015	TU_FS_2015	FS	2	RHT_216	IFA_TULLN	34	0.2	90	NA
2015	TU_FS_2015	FS	2	Goncourt	VARIETY	32	41.8	75	NA
2015	TU_FS_2015	FS	2	Nuage	VARIETY	34	121	80	NA
2015	TU_FS_2015	FS	2	Lyrik	VARIETY	34	129	80	NA
2015	TU_FS_2015	FS	2	CH761525	VARIETY	34	26.4	90	NA
2015	TU_FS_2015	FS	2	L_2	DESPREZ	34	22.4	80	NA
2015	TU_FS_2015	FS	2	L_14	RAGT	30	14	70	NA
2015	TU_FS_2015	FS	2	Sy_Moisson	VARIETY	32	4.8	80	NA
2015	TU_FS_2015	FS	2	20818.1.2	IFA_TULLN	34	0	100	NA
2015	TU_FS_2015	FS	2	Calabro	VARIETY	32	60.4	70	NA
2015	TU_FS_2015	FS	2	Isengrain	VARIETY	32	22	70	NA
2015	TU_FS_2015	FS	2	Fairplay	VARIETY	38	129	75	NA
2015	TU_FS_2015	FS	2	Azzuro	VARIETY	34	2.8	80	NA
2015	TU_FS_2015	FS	2	Timber	VARIETY	36	231	70	NA
2015	TU_FS_2015	FS	2	Fluor	VARIETY	34	7.4	80	NA
2015	TU_FS_2015	FS	2	L_5	DESPREZ	30	2.4	80	NA
2015	TU_FS_2015	FS	2	Ambello	VARIETY	32	12.8	80	NA
2015	TU_FS_2015	FS	2	Ronsard	VARIETY	32	14.4	70	NA
2015	TU_FS_2015	FS	2	1309.2.4_P1	IFA_TULLN	38	0.2	105	NA
2015	TU_FS_2015	FS	2	L_4	DESPREZ	34	35	80	NA
2015	TU_FS_2015	FS	2	Basmati	VARIETY	30	8	80	NA
2015	TU_FS_2015	FS	2	Sokal	VARIETY	32	6.4	70	NA
2015	TU_FS_2015	FS	2	Boregar	VARIETY	34	45	70	NA
2015	TU_FS_2015	FS	2	1351.5.10_P2	IFA_TULLN	36	0	95	NA
2015	TU_FS_2015	FS	2	Tobak	VARIETY	36	119	80	NA
2015	TU_FS_2015	FS	2	1308.2.5_P1	IFA_TULLN	34	0	90	NA
2015	TU_FS_2015	FS	2	L_15	RAGT	30	1	75	NA
2015	TU_FS_2015	FS	2	Cavalino	VARIETY	32	18	80	NA
2015	TU_FS_2015	FS	2	Bonifacio	VARIETY	30	3.2	75	NA
2015	TU_FS_2015	FS	2	Karillon	VARIETY	34	83	80	NA
2015	TU_FS_2015	FS	2	Aligator	VARIETY	32	34.4	80	NA
2015	TU_FS_2015	FS	2	Miroir	VARIETY	30	2.4	70	NA
2015	TU_FS_2015	FS	2	BIO_110	IFA_TULLN	32	1	90	NA
2015	TU_FS_2015	FS	2	Bagou	VARIETY	32	131.8	70	NA
2015	TU_FS_2015	FS	2	Bergamo	VARIETY	36	84	80	NA
2015	TU_FS_2015	FS	2	Compil	VARIETY	32	44	70	NA
2015	TU_FS_2015	FS	2	RHT_269	IFA_TULLN	34	0	80	NA
2015	TU_FS_2015	FS	2	BIO_5019	IFA_TULLN	36	72	75	NA
2015	TU_FS_2015	FS	2	Cordiale	VARIETY	34	153	75	NA
2015	TU_FS_2015	FS	2	Arlequin	VARIETY	32	26	75	NA
2015	TU_FS_2015	FS	2	Apache	VARIETY	32	14	75	NA
